# Supplementary material for: In Vitro/In Vivo Translation of Synergistic Combination of MDM2 and MEK Inhibitors in Melanoma Using PBPK/PD Modelling: Part II
Source: MDPI journal article supplement (doi:10.3390/ijms231911939), 2022-10-08
Supplement: s1 [file s1]

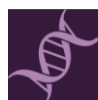

Supplementary Materials

# In Vitro/In Vivo Translation of Synergistic Combination of MDM2 and MEK Inhibitors in Melanoma Using PBPK/PD Modelling: Part II

Jakub Witkowski, Sebastian Polak, Zbigniew Rogulski and Dariusz Pawelec

**Table S1.** Siremadlin and trametinib resistant population estimates and pharmacodynamic interaction parameters [1].

| Compound                | % of viability at last observation $\pm$ SD | Synergyfinder % Mean score $\delta \pm$ SD | Synergy % $\beta$ parameter $\pm$ SD |
|-------------------------|---------------------------------------------|--------------------------------------------|--------------------------------------|
| Siremadlin              | 21.445 $\pm$ 6.389                          | -                                          | -                                    |
| Trametinib              | 14.097 $\pm$ 2.594                          | -                                          | -                                    |
| Siremadlin + Trametinib |                                             | 7.48 $\pm$ 1.88                            | 23.13 $\pm$ 4.80                     |

**Table S2.** Differences in PBPK model parameters with and without interaction at PK level and related to administration in various formulations.

| Drug/<br>Parameter             | $k_a$ (1/h) | $t_{lag}$ (h) | $f_a$ (%) | Tumour PS<br>(ml/min/ml) | Tumour P-gp efflux<br>transporter $CL_{int}$ (ml/min/ml) | Notes                                                                                    |
|--------------------------------|-------------|---------------|-----------|--------------------------|----------------------------------------------------------|------------------------------------------------------------------------------------------|
| Siremadlin                     | 0.31        | 0             | 0.6023    | 0.084656                 | 95.54                                                    | -                                                                                        |
| Siremadlin<br>(literature)     | 3.77        | 0.73          | 0.6607    | -                        | -                                                        | $f_a$ optimized from range 0.5972-0.6607 (calculated from P.O. and I.V. data [2,3])      |
| Siremadlin<br>(PK interaction) | 0.65        | -             | -         | 0.1407                   | 47.12                                                    | -                                                                                        |
| Trametinib                     | 1.25        | 0.85          | 0.7247    | 0.02482                  | 60.27                                                    | -                                                                                        |
| Trametinib<br>(literature)     | 0.87        | 0             | 0.7796    | -                        | -                                                        | $f_a$ optimized from range 0.6893-0.7796 (calculated from P.O. and I.V. data from [4,5]) |
| Trametinib<br>(PK interaction) | 0.357       | 0             | 0.6407    | 0.11092                  | 214.43                                                   | -                                                                                        |

$k_a$ : absorption rate constant.  $t_{lag}$ : lag time.  $f_a$ : fraction of dose absorbed. Tumour PS: Passive permeability clearance between intra- and extracellular water of tumour. Tumour P-gp efflux transporter  $CL_{int}$ : In vitro transporter mediated intrinsic clearance in tumour.

**Table S3.** Comparison of predicted vs observed key PK parameters (AUC/Cmax/Tmax) for siremadlin.

| Tissue         | $AUC_{obs}$ | $AUC_{pred}$ | $AUC_{pred}/AUC_{obs}$ | $C_{max,obs}$ | $C_{max,pred}$ | $C_{max,pred}/C_{max,obs}$ | $T_{max,obs}$ | $T_{max,pred}$ | $T_{max,pred}/T_{max,obs}$ |
|----------------|-------------|--------------|------------------------|---------------|----------------|----------------------------|---------------|----------------|----------------------------|
| Plasma         | 95092.97    | 88087.91     | 0.93                   | 9777.67       | 10752.58       | 1.10                       | 1.50          | 2.77           | 1.85                       |
| A375<br>tumour | 179026.48   | 218705.89    | 1.22                   | 16214.30      | 16214.30       | 1.00                       | 1.50          | 6.40           | 4.26                       |
| Muscle         | 170157.96   | 157590.47    | 0.93                   | 21631.93      | 19189.57       | 0.89                       | 1.50          | 3.00           | 2.00                       |
| Spleen         | 211232.59   | 195660.09    | 0.93                   | 25195.17      | 23881.49       | 0.95                       | 1.50          | 2.82           | 1.88                       |
| Brain          | 8942.01     | 8280.25      | 0.93                   | 773.94        | 1010.74        | 1.31                       | 1.50          | 2.77           | 1.85                       |
| Heart          | 286296.23   | 265203.84    | 0.93                   | 36316.90      | 32372.64       | 0.89                       | 1.50          | 2.77           | 1.85                       |
| Kidney         | 353015.40   | 327004.35    | 0.93                   | 40979.10      | 39916.46       | 0.97                       | 1.50          | 2.78           | 1.86                       |
| Skin           | 271818.44   | 251741.80    | 0.93                   | 19523.67      | 30669.64       | 1.57                       | 1.50          | 2.98           | 1.98                       |
| Lung           | 197152.26   | 182632.35    | 0.93                   | 22627.91      | 22293.34       | 0.99                       | 1.50          | 2.77           | 1.85                       |
| Gut            | 608367.79   | 563442.34    | 0.93                   | 59509.80      | 68644.24       | 1.15                       | 4.00          | 2.98           | 0.74                       |
| Liver          | 479296.64   | 444154.33    | 0.93                   | 59431.53      | 55581.49       | 0.94                       | 1.50          | 2.28           | 1.52                       |

**Table S4.** Comparison of predicted vs observed key PK parameters (AUC/Cmax/Tmax) for trametinib.

| Tissue         | $AUC_{obs}$ | $AUC_{pred}$ | $AUC_{pred}/AUC_{obs}$ | $C_{max,obs}$ | $C_{max,pred}$ | $C_{max,pred}/C_{max,obs}$ | $T_{max,obs}$ | $T_{max,pred}$ | $T_{max,pred}/T_{max,obs}$ |
|----------------|-------------|--------------|------------------------|---------------|----------------|----------------------------|---------------|----------------|----------------------------|
| Plasma         | 5580.83     | 5213.47      | 0.93                   | 567.02        | 626.09         | 1.10                       | 4.00          | 2.64           | 0.66                       |
| A375<br>tumour | 9131.17     | 8729.04      | 0.96                   | 587.25        | 587.25         | 1.00                       | 4.00          | 3.30           | 0.83                       |
| Muscle         | 5725.86     | 5345.50      | 0.93                   | 420.58        | 641.14         | 1.52                       | 1.50          | 2.78           | 1.86                       |
| Spleen         | 14596.18    | 13631.00     | 0.93                   | 930.88        | 1636.79        | 1.76                       | 1.50          | 2.70           | 1.80                       |
| Brain          | 1026.55     | 958.70       | 0.93                   | 55.48         | 115.14         | 2.08                       | 24.00         | 2.64           | 0.11                       |
| Heart          | 7542.96     | 7046.14      | 0.93                   | 639.78        | 846.22         | 1.32                       | 1.50          | 2.64           | 1.76                       |
| Kidney         | 18204.41    | 17005.08     | 0.93                   | 1471.71       | 2042.25        | 1.39                       | 1.50          | 2.66           | 1.78                       |
| Skin           | 6377.44     | 5954.98      | 0.93                   | 515.13        | 714.92         | 1.39                       | 4.00          | 2.72           | 0.68                       |
| Lung           | 7367.20     | 6880.24      | 0.93                   | 752.50        | 826.47         | 1.10                       | 4.00          | 2.64           | 0.66                       |
| Gut            | 30558.37    | 28521.48     | 0.93                   | 3044.37       | 3415.76        | 1.12                       | 1.50          | 2.84           | 1.90                       |
| Liver          | 30111.52    | 28146.52     | 0.93                   | 2356.01       | 3393.93        | 1.44                       | 4.00          | 2.50           | 0.62                       |

**Table S5.** Comparison of predicted vs observed key PK parameters (AUC/Cmax/Tmax) for siremadlin with interaction with trametinib.

| Tissue         | $AUC_{obs}$ | $AUC_{pred}$ | $AUC_{pred}/AUC_{obs}$ | $C_{max,obs}$ | $C_{max,pred}$ | $C_{max,pred}/C_{max,obs}$ | $T_{max,obs}$ | $T_{max,pred}$ | $T_{max,pred}/T_{max,obs}$ |
|----------------|-------------|--------------|------------------------|---------------|----------------|----------------------------|---------------|----------------|----------------------------|
| Plasma         | 107993.98   | 88326.59     | 0.82                   | 14559.95      | 15232.78       | 1.05                       | 1.50          | 1.78           | 1.18                       |
| A375<br>tumour | 218677.07   | 335953.22    | 1.54                   | 28613.74      | 28613.67       | 1.00                       | 1.50          | 5.08           | 3.38                       |
| Muscle         | 207541.97   | 158044.40    | 0.76                   | 30385.46      | 27093.64       | 0.89                       | 1.50          | 2.02           | 1.34                       |
| Spleen         | 231909.42   | 196197.92    | 0.85                   | 37783.50      | 33826.65       | 0.90                       | 1.50          | 1.82           | 1.22                       |
| Brain          | 10637.20    | 8302.71      | 0.78                   | 1399.80       | 1431.88        | 1.02                       | 1.50          | 1.78           | 1.18                       |
| Heart          | 321668.15   | 265924.65    | 0.83                   | 48642.34      | 45860.83       | 0.94                       | 1.50          | 1.79           | 1.19                       |
| Kidney         | 446226.08   | 327894.16    | 0.73                   | 67620.00      | 56547.47       | 0.84                       | 1.50          | 1.79           | 1.19                       |
| Skin           | 317510.56   | 252462.44    | 0.80                   | 33168.04      | 43332.58       | 1.31                       | 1.50          | 1.99           | 1.33                       |
| Lung           | 239204.08   | 183126.99    | 0.77                   | 36854.11      | 31582.12       | 0.86                       | 1.50          | 1.78           | 1.18                       |
| Gut            | 654824.01   | 565055.19    | 0.86                   | 97109.13      | 96986.58       | 1.00                       | 1.50          | 1.99           | 1.33                       |
| Liver          | 582012.28   | 445220.68    | 0.76                   | 95121.30      | 81889.52       | 0.86                       | 1.50          | 1.21           | 0.81                       |

**Table S6.** Comparison of predicted vs observed key PK parameters (AUC/Cmax/Tmax) for trametinib with interaction with siremadlin.

| Tissue         | $AUC_{obs}$ | $AUC_{pred}$ | $AUC_{pred}/AUC_{obs}$ | $C_{max,obs}$ | $C_{max,pred}$ | $C_{max,pred}/C_{max,obs}$ | $T_{max,obs}$ | $T_{max,pred}$ | $T_{max,pred}/T_{max,obs}$ |
|----------------|-------------|--------------|------------------------|---------------|----------------|----------------------------|---------------|----------------|----------------------------|
| Plasma         | 4484.99     | 4554.43      | 1.02                   | 353.65        | 390.02         | 1.10                       | 4.00          | 4.03           | 1.01                       |
| A375<br>tumour | 9656.67     | 11739.16     | 1.22                   | 714.53        | 714.53         | 1.00                       | 4.00          | 7.57           | 1.89                       |
| Muscle         | 5713.07     | 4668.55      | 0.82                   | 456.60        | 399.94         | 0.88                       | 4.00          | 4.15           | 1.04                       |
| Spleen         | 13530.74    | 11906.40     | 0.88                   | 764.55        | 1019.89        | 1.33                       | 4.00          | 4.07           | 1.02                       |
| Brain          | 1028.61     | 837.56       | 0.81                   | 55.48         | 71.73          | 1.29                       | 24.00         | 4.03           | 0.17                       |
| Heart          | 7870.39     | 6155.72      | 0.78                   | 753.69        | 527.17         | 0.70                       | 4.00          | 4.03           | 1.01                       |
| Kidney         | 17234.73    | 14855.28     | 0.86                   | 1324.75       | 1272.21        | 0.96                       | 4.00          | 4.03           | 1.01                       |
| Skin           | 6882.91     | 5201.36      | 0.76                   | 633.49        | 445.57         | 0.70                       | 4.00          | 4.09           | 1.02                       |
| Lung           | 7656.70     | 6014.07      | 0.79                   | 846.31        | 515.33         | 0.61                       | 4.00          | 4.03           | 1.01                       |
| Gut            | 29204.64    | 24907.32     | 0.85                   | 2779.56       | 2133.50        | 0.77                       | 1.50          | 4.19           | 2.79                       |

| Tissue | $AUC_{obs}$ | $AUC_{pred}$ | $AUC_{pred}/AUC_{obs}$ | $C_{max,obs}$ | $C_{max,pred}$ | $C_{max,pred}/C_{max,obs}$ | $T_{max,obs}$ | $T_{max,pred}$ | $T_{max,pred}/T_{max,obs}$ |
|--------|-------------|--------------|------------------------|---------------|----------------|----------------------------|---------------|----------------|----------------------------|
| Liver  | 30547.92    | 24593.83     | 0.81                   | 2486.85       | 2107.07        | 0.85                       | 4.00          | 3.89           | 0.97                       |

**Table S7.** Parameters of the PBPK model for siremadlin.

| Model Section                               | Parameter (Units)               | Value           | Source/Reference/Comments                                                                                                                                                             |
|---------------------------------------------|---------------------------------|-----------------|---------------------------------------------------------------------------------------------------------------------------------------------------------------------------------------|
| Physiochemical properties and blood binding | Molecular Weight (g/mol)        | 555.41          | -                                                                                                                                                                                     |
|                                             | logP                            | 2.99            | <i>In vitro</i> determined - Unpublished Adamed Pharma data (value similar to reported 2.90 [6])                                                                                      |
|                                             | Compound Type                   | Monoprotic Base | -                                                                                                                                                                                     |
|                                             | pKa                             | 1.69            | <i>In vitro</i> determined - Unpublished Adamed Pharma data                                                                                                                           |
|                                             | B/P                             | 0.76            | <i>In vitro</i> determined - Unpublished Adamed Pharma data (arithmetic mean from 2.5-10uM - range 0.66-0.86)                                                                         |
|                                             | fu plasma                       | 0.0966          | <i>In vitro</i> determined - Unpublished Adamed Pharma data (arithmetic mean from 2.5-10uM range after 18h of incubation which was needed to reach equilibrium – range 0.0707-0.1113) |
| Absorption                                  | Absorption model                | First-Order     | -                                                                                                                                                                                     |
|                                             | fa                              | 0.60231         | Optimized from range 0.5697-0.6303 (calculated from Adamed Pharma P.O. data and I.V. data from [3])                                                                                   |
|                                             | ka (1/h)                        | 0.31            | Optimized                                                                                                                                                                             |
|                                             | Lag time (h)                    | 0               | Optimized                                                                                                                                                                             |
| Distribution                                | Distribution model              | Full PBPK       | -                                                                                                                                                                                     |
|                                             | Vss (L/kg)                      | 2.802           | Simcyp predicted (Method 3) – value similar to the reported data range 2.456-3.232 [3]                                                                                                |
|                                             | Smoothing function              | Enabled         | -                                                                                                                                                                                     |
|                                             | Sub-Cellular Distribution model | Enabled         | Only for Adipose and Bone tissues                                                                                                                                                     |

| Model Section | Parameter (Units)                                                           | Value                             | Source/Reference/Comments                                                               |
|---------------|-----------------------------------------------------------------------------|-----------------------------------|-----------------------------------------------------------------------------------------|
|               | Olive oil:water partition as a surrogate for neutral lipid partition option | Disabled                          | -                                                                                       |
|               | Kp Brain                                                                    | 0.094                             | Calculated according to Equation 1 based on Adamed Pharma data                          |
|               | Kp Gut                                                                      | 6.3976                            | Calculated according to Equation 1 based on Adamed Pharma data                          |
|               | Kp Heart                                                                    | 3.0107                            | Calculated according to Equation 1 based on Adamed Pharma data                          |
|               | Kp Kidney                                                                   | 3.7123                            | Calculated according to Equation 1 based on Adamed Pharma data                          |
|               | Kp Liver                                                                    | 5.0403                            | Calculated according to Equation 1 based on Adamed Pharma data                          |
|               | Kp Lung                                                                     | 2.0733                            | Calculated according to Equation 1 based on Adamed Pharma data                          |
|               | Kp Muscle                                                                   | 1.7894                            | Calculated according to Equation 1 based on Adamed Pharma data                          |
|               | Kp Skin                                                                     | 2.8584                            | Calculated according to Equation 1 based on Adamed Pharma data                          |
|               | Kp Spleen                                                                   | 2.2213                            | Calculated according to Equation 1 based on Adamed Pharma data                          |
|               | Kp Scalar                                                                   | 1.4478                            | Optimized                                                                               |
| Elimination   | Clearance type                                                              | Mouse Hepatocytes                 | -                                                                                       |
|               | Hep intrinsic CL (mL/min/10 <sup>6</sup> cells)                             | 18.15                             | Optimized from range 18.15-18.58 (In vitro determined - Unpublished Adamed Pharma data) |
|               | fu_inc                                                                      | 0.54                              | Optimized from range 0.52-0.64 (In vitro determined - Unpublished Adamed Pharma data)   |
| Tumour        | Tumour model type                                                           | Permeability-limited tumour model | -                                                                                       |

| Model Section | Parameter (Units)                                            | Value      | Source/Reference/Comments                        |
|---------------|--------------------------------------------------------------|------------|--------------------------------------------------|
|               | Tumour PS (mL/min/mL of tumour volume)                       | 0.084656   | Manual optimization                              |
|               | Tumour P-gp efflux transporter $CL_{int}$ (mL/min mL tumour) | 95.54      | Manual optimization                              |
|               | $f_{UEW}$                                                    | 0.076      | Manual optimization                              |
|               | $f_{UC}$                                                     | 0.005      | Manual optimization                              |
| Trial Design  | Administration route                                         | Oral       | -                                                |
|               | Dose (mg/kg)                                                 | 100        | -                                                |
|               | Dose interval $\tau$ (h)                                     | 24         | -                                                |
|               | Condition                                                    | Fasted     | --                                               |
|               | Simulation duration                                          | 24h<br>72h | Single administration<br>Multiple administration |

*B/P*: blood to plasma partition ratio. *fu plasma*: fraction unbound in plasma. *fa*: fraction of dose absorbed. *ka*: absorption rate constant. *V<sub>ss</sub>*: volume of distribution at steady-state. *K<sub>p</sub>*: tissue-to-plasma partition coefficient. Hep: Hepatocytes. *CL*: clearance. *fu<sub>inc</sub>*: fraction of unbound drug in the *in vitro* system. Tumour *PS*: Passive permeability clearance between intra- and extracellular water of tumour. Tumour *P-gp efflux transporter CL<sub>int</sub>*: *In vitro* transporter mediated intrinsic clearance in tumour. *f<sub>UEW</sub>*: fraction unbound in the extracellular water of tumour. *F<sub>UC</sub>*: fraction unbound in the intracellular water of tumour.

**Table S8.** Parameters of the PBPK model for trametinib.

| Model Section                               | Parameter (Units)        | Value  | Source/Reference/Comments                                   |
|---------------------------------------------|--------------------------|--------|-------------------------------------------------------------|
| Physiochemical properties and blood binding | Molecular Weight (g/mol) | 615.39 | -                                                           |
|                                             | logP                     | 4.10   | <i>In vitro</i> determined - Unpublished Adamed Pharma data |

| Model Section | Parameter (Units)                                                           | Value           | Source/Reference/Comments                                                                                        |
|---------------|-----------------------------------------------------------------------------|-----------------|------------------------------------------------------------------------------------------------------------------|
|               | Compound Type                                                               | Monoprotic Base | -                                                                                                                |
|               | pKa                                                                         | 11.15           | <i>In vitro</i> determined - Unpublished Adamed Pharma data                                                      |
|               | B/P                                                                         | 0.70            | <i>In vitro</i> determined - Unpublished Adamed Pharma data (arithmetic mean from 0.81uM – range – 0.68-0.72 [7] |
|               | fu plasma                                                                   | 0.05            | [7]                                                                                                              |
| Absorption    | Absorption model                                                            | First-Order     | -                                                                                                                |
|               | fa                                                                          | 0.7247          | Optimized from range 0.6407-0.7247 (calculated from Adamed Pharma P.O. data and I.V. data from [5])              |
|               | ka (1/h)                                                                    | 1.25            | Optimized                                                                                                        |
|               | Lag time (h)                                                                | 0.85            | Optimized                                                                                                        |
| Distribution  | Distribution model                                                          | Full PBPK       | -                                                                                                                |
|               | Vss (L/kg)                                                                  | 1.35            | Simcyp predicted (Method 3) – value similar to the reported 0.9L/kg [7]                                          |
|               | Smoothing function                                                          | Enabled         | -                                                                                                                |
|               | Sub-Cellular Distribution model                                             | Enabled         | Only for Adipose and Bone tissues                                                                                |
|               | Olive oil:water partition as a surrogate for neutral lipid partition option | Disabled        | -                                                                                                                |
|               | Kp Brain                                                                    | 0.1839          | Calculated according to Equation 1 based on Adamed Pharma data                                                   |
|               | Kp Gut                                                                      | 5.4756          | Calculated according to Equation 1 based on Adamed Pharma data                                                   |
|               | Kp Heart                                                                    | 1.3516          | Calculated according to Equation 1 based on Adamed Pharma data                                                   |
|               | Kp Kidney                                                                   | 3.2620          | Calculated according to Equation 1 based on Adamed Pharma data                                                   |

| Model Section | Parameter (Units)                                                   | Value                             | Source/Reference/Comments                                      |
|---------------|---------------------------------------------------------------------|-----------------------------------|----------------------------------------------------------------|
|               | Kp Liver                                                            | 5.3955                            | Calculated according to Equation 1 based on Adamed Pharma data |
|               | Kp Lung                                                             | 1.3201                            | Calculated according to Equation 1 based on Adamed Pharma data |
|               | Kp Muscle                                                           | 1.0260                            | Calculated according to Equation 1 based on Adamed Pharma data |
|               | Kp Skin                                                             | 1.1427                            | Calculated according to Equation 1 based on Adamed Pharma data |
|               | Kp Spleen                                                           | 2.6154                            | Calculated according to Equation 1 based on Adamed Pharma data |
|               | Kp Scalar                                                           | 0.0276                            | Optimized                                                      |
| Elimination   | Clearance type                                                      | I.V. clearance                    | -                                                              |
|               | CL <sub>iv</sub> (mL/min)                                           | 0.096425                          | Similar to the previously reported value 3.5 mL/min/kg [7]     |
| Tumour        | Tumour model type                                                   | Permeability-limited tumour model | -                                                              |
|               | Tumour PS (mL/min/mL of tumour volume)                              | 0.02482                           | Manual optimization                                            |
|               | Tumour P-gp efflux transporter CL <sub>int</sub> (mL/min mL tumour) | 60.27                             | Manual optimization                                            |
|               | f <sub>uEW</sub>                                                    | 0.016                             | Manual optimization                                            |
|               | f <sub>uIC</sub>                                                    | 0.0025                            | Manual optimization                                            |
|               |                                                                     |                                   |                                                                |
| Trial Design  | Administration route                                                | Oral                              | -                                                              |



| Model Section | Parameter (Units)        | Value       | Source/Reference/Comments                        |
|---------------|--------------------------|-------------|--------------------------------------------------|
|               | Dose (mg/kg)             | 1           | -                                                |
|               | Dose interval $\tau$ (h) | 24          | -                                                |
|               | Condition                | Fasted      | --                                               |
|               | Simulation duration      | 24h<br>144h | Single administration<br>Multiple administration |

*B/P*: blood to plasma partition ratio. *fu plasma*: fraction unbound in plasma. *fa*: fraction of dose absorbed. *ka*: absorption rate constant. *Vss*: volume of distribution at steady-state. *Kp*: tissue-to-plasma partition coefficient. Hep: Hepatocytes. *CL*: clearance. *fu\_inc*: fraction of unbound drug in the *in vitro* system. Tumour *PS*: Passive permeability clearance between intra- and extracellular water of tumour. *Tumour P-gp efflux transporter CL<sub>int</sub>*: *In vitro* transporter mediated intrinsic clearance in tumour. *fu<sub>EW</sub>*: fraction unbound in the extracellular water of tumour. *Fu<sub>IC</sub>*: fraction unbound in the intracellular water of tumour.

**Table S9.** Parameters of the PD (TGI) models for single administration of siremadlin, trametinib and their combination in the current study. Models outcomes are depicted in Figures 3-4 and S4.

| Compound/<br>Parameter     | Description                                                        | Vehicle  | Siremadlin    | Trametinib    | Siremadlin+Trametinib       |
|----------------------------|--------------------------------------------------------------------|----------|---------------|---------------|-----------------------------|
| Dose (mg/kg)               | -                                                                  | -        | 40/100        | 0.3/1         | 40+0.3/40+1/100+0.3/100+1   |
| Administration<br>schedule | -                                                                  | qdx6     | qdx3          | qdx6          | qdx3/qdx6                   |
| Score                      | -                                                                  | -519     | -103/-145     | -135/-156     | -96/-142/-152/-176          |
| TS0                        | initial<br>tumour<br>size sensitive<br>population<br>(mL)          | 0.1628   | 0.1723/0.1635 | 0.1796/0.1671 | 0.1699/0.1663/0.1655/0.1681 |
| TSr0                       | initial<br>tumour<br>size resistant<br>population<br>(mL)          | 0.000001 | 0.000001      | 0.000001      | 0.000001                    |
| crck                       | initial tumour size and<br>max tumour size<br>correlation constant | 15.027   | 12.50/9.90    | 6.70/10.60    | 16.10/9.60/10.20/8.75       |

|                         |                                                  |          |               |                |                             |
|-------------------------|--------------------------------------------------|----------|---------------|----------------|-----------------------------|
| kge                     | Tumour growth rate (1/day)                       | 0.005782 | 0.0072        | 0.0063/0.0075  | 0.0063/0.0075/0.0063/0.0075 |
| s                       | Killing constant coefficient                     | -        | 0.3           | 0.3            | 0.3                         |
| lambda                  | Resistance factor                                | -        | 7             | 5              | 12                          |
| tau                     | Effect delay (h)                                 | -        | 10/11         | 4.5/0.5        | 5.5/9.5/6.5/10.5            |
| kkill                   | Tumour killing constant                          | -        | 0.0086/0.0215 | 0.00705/0.0235 | -                           |
| ksr                     | Sensitive to resistant cells conversion rate (%) | -        | 0.2145        | 0.141          | 0.03024                     |
| gamma                   | Drug interaction $\beta$ parameter (%)           | -        | -             | -              | 1.2313                      |
| AUC ratio Siremadlin    | Exposure ratio in combination                    | -        | -             | -              | 1.74/1.00/1.06/1.14         |
| AUC ratio Trametinib    | Exposure ratio in combination                    | -        | -             | -              | 1.18/0.70/0.82/0.80         |
| Mean Relative Error (%) | -                                                | 3.44     | 8.23/11.71    | 6.00/13.89     | 19.98/13.45/18.94/14.16     |

**Table S10.** Parameters of the PD (TGI) models for siremadlin in verification datasets. Models outcome is depicted in Figure S5.

| Compound/<br>Parameter     | Description | Vehicle        | Siremadlin | Siremadlin |
|----------------------------|-------------|----------------|------------|------------|
| Dose (mg/kg)               | -           | -              | 25/50      | 50/100     |
| Administration<br>schedule | -           | qdx5/<br>q7dx2 | qdx5       | q7dx2      |

| Source                     | -                                                                  | Adamed Pharma   | Adamed Pharma | Adamed Pharma |
|----------------------------|--------------------------------------------------------------------|-----------------|---------------|---------------|
| Score                      | -                                                                  | -70/-60         | -58/-44       | -57/-41       |
| TS0                        | initial<br>tumour size sensitive<br>population (mL)                | 0.1354/0.1355   | 0.1368/0.1376 | 0.1362/0.1375 |
| TSr0                       | initial<br>tumour size resistant<br>population (mL)                | 0.000001        | 0.000001      | 0.000001      |
| crck                       | initial tumour size and<br>max tumour size<br>correlation constant | 89.000/88.901   | 20.0/34.0     | 12.5/10.0     |
| kge                        | Tumour growth rate<br>(1/day)                                      | 0.00499/0.00537 | 0.0072        | 0.0072        |
| s                          | Killing constant<br>coefficient                                    | -               | 0.3           | 0.3           |
| lambda                     | Resistance<br>factor                                               | -               | 7             | 7             |
| tau                        | Effect<br>delay (h)                                                | -               | 0/2.13        | 2.117/5.025   |
| kkill                      | Tumour<br>killing<br>constant                                      | -               | 0.0090/0.0179 | 0.0072/0.0143 |
| ksr                        | Sensitive<br>to resistant cells<br>conversion rate (%)             | -               | 0.2145        | 0.2145        |
| AUC ratio Sire-<br>madlin  | Exposure<br>ratio                                                  | -               | 0.625         | 0.625         |
| Mean Relative<br>Error (%) | -                                                                  | 2.76/3.33       | 4.43/8.17     | 5.23/4.15     |

**Table S11.** Parameters of the PD (TGI) models for trametinib in verification datasets. Models outcome is depicted in Figure S6.

| Compound/<br>Parameter | Description | Vehicle | Trametinib | Vehicle | Trametinib |
|------------------------|-------------|---------|------------|---------|------------|
|------------------------|-------------|---------|------------|---------|------------|

|                            |                                                                       |          |          |          |                       |
|----------------------------|-----------------------------------------------------------------------|----------|----------|----------|-----------------------|
| Dose (mg/kg)               | -                                                                     | -        | 0.3      | -        | 0.1/0.3/3             |
| Administration<br>schedule | -                                                                     | qdx19    | qdx36    | qdx14    | qdx14                 |
| Source                     | -                                                                     | [8]      | [8]      | [9]      | [9]                   |
| Score                      | -                                                                     | -29      | 39       | -29      | -30/-50/203           |
| TS0                        | initial<br>tumour<br>size sensitive<br>population<br>(mL)             | 0.2020   | 0.1854   | 0.2281   | 0.2253/0.2329/0.2186  |
| TSr0                       | initial<br>tumour<br>size resistant<br>population<br>(mL)             | 0.000001 | 0.000001 | 0.000001 | 0.000001              |
| crck                       | initial tumour size<br>and<br>max tumour size<br>correlation constant | 8.896    | 14.8     | 6.468    | 6.20/4.40/0.87        |
| kge                        | Tumour<br>growth rate<br>(1/day)                                      | 0.00766  | 0.0081   | 0.00917  | 0.0093/0.0097/0.014   |
| s                          | Killing<br>constant<br>coefficient                                    | -        | 0.3      | -        | 0.3                   |
| lambda                     | Resistance<br>factor                                                  | -        | 5        | -        | 5                     |
| tau                        | Effect<br>delay (h)                                                   | -        | 5.542    | -        | 25                    |
| kkill                      | Tumour<br>killing<br>constant                                         | -        | 0.0423   | -        | 0.0055/0.01645/0.1645 |
| ksr                        | Sensitive<br>to resistant cells<br>conversion rate (%)                | -        | 0.141    | -        | 0.141                 |

|                            |                   |      |       |      |                 |
|----------------------------|-------------------|------|-------|------|-----------------|
| AUC ratio Tra-<br>metinib  | Exposure<br>ratio | -    | 0.328 | -    | 1/1/0.2         |
| Mean Relative<br>Error (%) | -                 | 3.72 | 5.26  | 4.96 | 3.31/4.03/19.72 |

**Table S12.** Relationships between universal TGI model parameters for siremadlin, trametinib and its combination. Visualization of relationships between parameters are depicted in Figures S7-S14.

| Parameter/<br>Compound | Vehicle                    | Siremadlin (HDM)                                                                                                                                         | Trametinib (TRA)                                                                                                                                                                                                                         | Siremadlin+<br>Trametinib<br>combination                                                                             |
|------------------------|----------------------------|----------------------------------------------------------------------------------------------------------------------------------------------------------|------------------------------------------------------------------------------------------------------------------------------------------------------------------------------------------------------------------------------------------|----------------------------------------------------------------------------------------------------------------------|
| TSr0                   | Fixed ~0                   | Fixed ~0                                                                                                                                                 | Fixed ~0                                                                                                                                                                                                                                 | Fixed ~0                                                                                                             |
| TS0                    | Initial study<br>arm value | Initial study arm value                                                                                                                                  | Initial study arm value                                                                                                                                                                                                                  | Initial study arm value                                                                                              |
| crck                   | Estimated (x)              | $-0.0506 \cdot \text{dose} + 14.839$<br>[R <sup>2</sup> = 0.989] <sup>1</sup>                                                                            | $(-0.0041 + \text{kge}) / (0.00033 - 0.000011 \cdot \text{dose})$ [R <sup>2</sup> =1] <sup>2</sup>                                                                                                                                       | $(-9.153 + \text{HDM crck}) / (-1.057 + 0.671 \cdot \text{TRA crck}) + 8.506$ [R <sup>2</sup> =1] <sup>3</sup>       |
| kge                    | Estimated (x)              | 1.2457x                                                                                                                                                  | $0.0017 \cdot \text{TRA dose} + 0.0058$<br>[R <sup>2</sup> =0.996] <sup>4</sup>                                                                                                                                                          | As in longer administered drug/ in<br>case of equal administration time:<br>mean (Siremadlin kge; Trametinib<br>kge) |
| AUC ratio              | -                          | $2.744 - 1.834 \cdot \text{TRA dose} - 0.017 \cdot \text{HDM dose} + 0.019 \cdot \text{HDM dose} \cdot \text{TRA dose}$ [R <sup>2</sup> =1] <sup>5</sup> | $-0.000016 \cdot \text{TRA dose} \cdot (\text{HDM dose})^2 + 0.00057 \cdot (\text{HDM dose})^2 \cdot (\text{TRA dose})^2 - 0.006 \cdot (\text{HDM dose})^{1.5} \cdot (\text{TRA dose})^{1.5} + 1.36$<br>[R <sup>2</sup> =1] <sup>6</sup> | -                                                                                                                    |
| a                      | -                          | 0.00007167                                                                                                                                               | -                                                                                                                                                                                                                                        | -                                                                                                                    |
| b                      | -                          | -                                                                                                                                                        | 0.003917                                                                                                                                                                                                                                 | -                                                                                                                    |

|        |   |                                                                        |                                                                                                                                                                               |                                                                                                                                                          |
|--------|---|------------------------------------------------------------------------|-------------------------------------------------------------------------------------------------------------------------------------------------------------------------------|----------------------------------------------------------------------------------------------------------------------------------------------------------|
| kill   | - | $a * \text{HDM dose} * \text{number of doses} * \text{exposure ratio}$ | $b * \text{TRA dose} * \text{number of doses} * \text{exposure ratio}$                                                                                                        | $(a * \text{HDM dose} * \text{number of doses} * \text{exposure ratio} + b * \text{TRA dose} * \text{number of doses} * \text{exposure ratio}) * \gamma$ |
| s      | - | Estimated (x)                                                          | Estimated (y)                                                                                                                                                                 | Mean (x;y)                                                                                                                                               |
| lambda | - | Estimated (x)                                                          | Estimated (y)                                                                                                                                                                 | $x + y$                                                                                                                                                  |
| tau    | - | $6.8133 * \text{HDM dose}^{0.104} [R^2=1]^7$                           | $(-0.55 * \text{TRA dose} / (-0.01 * \text{TRA dose} - 1.51 * \text{kge} + \text{TRA dose} * \text{kge})) - 46.18 * \text{TRA dose} + 7268.45 * \text{kge} - 42.01 [R^2=1]^8$ | $ \text{HDM tau} - \text{TRA tau} $                                                                                                                      |
| ksr    | - | Estimated (x)                                                          | Estimated (y)                                                                                                                                                                 | $x * y$                                                                                                                                                  |
| gamma  | - | -                                                                      | -                                                                                                                                                                             | From <i>in vitro</i> synergy package analysis <sup>9</sup>                                                                                               |

<sup>1</sup> Relationship between parameters is depicted in Figure S7.

<sup>2</sup> Relationship between parameters is depicted in Figure S8.

<sup>3</sup> Relationship between parameters is depicted in Figure S9.

<sup>4</sup> Relationship between parameters is depicted in Figure S10.

<sup>5</sup> Relationship between parameters is depicted in Figure S11.

<sup>6</sup> Relationship between parameters is depicted in Figure S12.

<sup>7</sup> Relationship between parameters is depicted in Figure S13.

<sup>8</sup> Relationship between parameters is depicted in Figure S14.

<sup>9</sup> See Table S1.

**Table S13.** Comparison of siremadlin PK parameters between current study and previously performed at Adamed Pharma.

| Source        | Dose (mg/kg) | Cmax (nM) | Cmax ratio | AUC <sub>0-24h</sub> (nM x h) | AUC ratio |
|---------------|--------------|-----------|------------|-------------------------------|-----------|
| Current study | 100          | 9778      | 0.229      | 95093                         | 0.625     |
| Adamed Pharma | 100          | 42753     | 1.000      | 152225                        | 1.000     |

**Table S14.** Calculations of the HED doses for siremadlin and trametinib which are currently examined in clinical trials.

| Compound   | Regimen    | Cycle length                        | Dose range in clinical trials (mg) [10,11] | Human dose in simulation (mg/kg)* | Animal dose equivalent to HED in simulation (mg/kg)*, # | Notes                                     |
|------------|------------|-------------------------------------|--------------------------------------------|-----------------------------------|---------------------------------------------------------|-------------------------------------------|
| Siremadlin | qdx21 (1A) | 21                                  | 0.18-5.00                                  | -                                 | -                                                       |                                           |
| Siremadlin | qwx2 (1B)  | 28                                  | 1.71-2.86                                  | -                                 | -                                                       |                                           |
| Siremadlin | qdx14 (2A) | 28                                  | 0.01-0.29                                  | -                                 | -                                                       |                                           |
| Siremadlin | qdx7 (2C)  | 28                                  | 0.21-0.36                                  | -                                 | -                                                       |                                           |
| Siremadlin | qdx21 (1A) | 21                                  | -                                          | 3.69                              | 48.996                                                  | Tumour Stasis dose modelled from [12]     |
| Siremadlin | qdx21 (1A) | 21                                  | -                                          | 5.00                              | 66.468                                                  | Maximal tested dose in this regimen       |
| Siremadlin | qwx2 (1B)  | 28                                  | -                                          | 1.71                              | 22.789                                                  | Recommended dose for expansion (RDE) [10] |
| Siremadlin | qwx2 (1B)  | 28                                  | -                                          | 2.46                              | 32.759                                                  | Tumour Stasis dose modelled from [12]     |
| Siremadlin | qwx2 (1B)  | 28                                  | -                                          | 2.86                              | 37.982                                                  | Maximal tested dose in this regimen       |
| Siremadlin | qdx14 (2A) | 28                                  | -                                          | 0.29                              | 3.798                                                   | Maximal tested dose in this regimen       |
| Siremadlin | qdx7 (2C)  | 28                                  | -                                          | 0.36                              | 4.748                                                   | Maximal tested dose in this regimen       |
| Trametinib | Continuous | Up to drug-related grade 2 toxicity | 2                                          | 0.029                             | 0.3798                                                  | Approved dose [5]                         |

\* Assumed Human bodyweight 70kg  
# Assumed mice body weight 0.02755kg (mean mice weight from drug combination study)

**Table S15.** Parameters for simulations of tumour volume with the use of universal TGI model at HED doses for single siremadlin administration. Simulation outcomes are depicted in Figures S15-S16.

| Siremadlin dose [mg/kg] | Doses in cycle | TSr0     | TS0   | crck  | kge    | kkill     | s   | lambda | tau   | ksr    |
|-------------------------|----------------|----------|-------|-------|--------|-----------|-----|--------|-------|--------|
| 22.789                  | 2              | 0.000001 | 0.170 | 13.69 | 0.0072 | 0.0032664 | 0.3 | 7      | 9.43  | 0.2145 |
| 32.759                  | 2              | 0.000001 | 0.170 | 13.18 | 0.0072 | 0.0046955 | 0.3 | 7      | 9.79  | 0.2145 |
| 37.982                  | 2              | 0.000001 | 0.170 | 12.92 | 0.0072 | 0.0054440 | 0.3 | 7      | 9.95  | 0.2145 |
| 48.996                  | 1              | 0.000001 | 0.170 | 12.36 | 0.0072 | 0.0035114 | 0.3 | 7      | 10.21 | 0.2145 |
| 66.468                  | 1              | 0.000001 | 0.170 | 11.48 | 0.0072 | 0.0047635 | 0.3 | 7      | 10.54 | 0.2145 |
| 3.798                   | 14             | 0.000001 | 0.170 | 14.65 | 0.0072 | 0.0038108 | 0.3 | 7      | 7.83  | 0.2145 |
| 4.748                   | 7              | 0.000001 | 0.170 | 14.60 | 0.0072 | 0.0023818 | 0.3 | 7      | 8.01  | 0.2145 |

**Table S16.** Parameters for simulations of tumour volume with the use of universal TGI model at HED doses for single trametinib administration. Simulation outcomes are depicted in Figures S17-S18.

| Trametinib dose [mg/kg] | Doses in cycle | TSr0     | TS0  | crck  | kge     | kkill     | s   | lambda | tau  | ksr   |
|-------------------------|----------------|----------|------|-------|---------|-----------|-----|--------|------|-------|
| 0.3798                  | 40             | 0.000001 | 0.17 | 7.163 | 0.00645 | 0.0595046 | 0.3 | 5      | 4.76 | 0.141 |
| 0.3798                  | 28             | 0.000001 | 0.17 | 7.163 | 0.00645 | 0.0416532 | 0.3 | 5      | 4.76 | 0.141 |
| 0.3798                  | 21             | 0.000001 | 0.17 | 7.163 | 0.00645 | 0.0312399 | 0.3 | 5      | 4.76 | 0.141 |
| 0.3798                  | 14             | 0.000001 | 0.17 | 7.163 | 0.00645 | 0.0208266 | 0.3 | 5      | 4.76 | 0.141 |

**Table S17.** Parameters for simulations of tumour volume with the use of universal TGI model at HED doses for siremadlin and trametinib co-administration. Simulations outcomes are depicted in Figures 5 and S19.

| Siremadl<br>in dose<br>[mg/kg] | Trameti<br>nib dose<br>[mg/kg] | Sire-<br>madlin<br>doses in<br>cycle | Trametin<br>ib doses<br>in cycle | TSr0     | TS0  | crck   | kge     | Siremadli<br>n AUC<br>ratio | Trametinib<br>AUC ratio | kkill<br>Siremadl<br>in | kkill<br>Trametin<br>ib | s   | lambda | tau   | ksr     | gamma  |
|--------------------------------|--------------------------------|--------------------------------------|----------------------------------|----------|------|--------|---------|-----------------------------|-------------------------|-------------------------|-------------------------|-----|--------|-------|---------|--------|
| 22.789                         | 0.3798                         | 2                                    | 40                               | 0.000001 | 0.17 | 14.539 | 0.00645 | 1.8240                      | 1.2438                  | 0.003266                | 0.059505                | 0.3 | 12     | 4.667 | 0.03024 | 1.2313 |
| 32.759                         | 0.3798                         | 2                                    | 40                               | 0.000001 | 0.17 | 13.867 | 0.00645 | 1.7265                      | 1.1731                  | 0.004695                | 0.059505                | 0.3 | 12     | 5.029 | 0.03024 | 1.2313 |
| 37.982                         | 0.3798                         | 2                                    | 40                               | 0.000001 | 0.17 | 13.516 | 0.00645 | 1.6754                      | 1.1345                  | 0.005444                | 0.059505                | 0.3 | 12     | 5.181 | 0.03024 | 1.2313 |
| 3.798                          | 0.3798                         | 14                                   | 40                               | 0.000001 | 0.17 | 15.818 | 0.00645 | 2.0098                      | 1.3508                  | 0.003811                | 0.059505                | 0.3 | 12     | 3.063 | 0.03024 | 1.2313 |
| 4.748                          | 0.3798                         | 7                                    | 40                               | 0.000001 | 0.17 | 15.754 | 0.00645 | 2.0005                      | 1.3472                  | 0.002382                | 0.059505                | 0.3 | 12     | 3.247 | 0.03024 | 1.2313 |
| 22.789                         | 0.3798                         | 2                                    | 28                               | 0.000001 | 0.17 | 14.539 | 0.00645 | 1.8240                      | 1.2438                  | 0.003266                | 0.041653                | 0.3 | 12     | 4.667 | 0.03024 | 1.2313 |
| 32.759                         | 0.3798                         | 2                                    | 28                               | 0.000001 | 0.17 | 13.867 | 0.00645 | 1.7265                      | 1.1731                  | 0.004695                | 0.041653                | 0.3 | 12     | 5.029 | 0.03024 | 1.2313 |
| 37.982                         | 0.3798                         | 2                                    | 28                               | 0.000001 | 0.17 | 13.516 | 0.00645 | 1.6754                      | 1.1345                  | 0.005444                | 0.041653                | 0.3 | 12     | 5.181 | 0.03024 | 1.2313 |
| 3.798                          | 0.3798                         | 14                                   | 28                               | 0.000001 | 0.17 | 15.818 | 0.00645 | 2.0098                      | 1.3508                  | 0.003811                | 0.041653                | 0.3 | 12     | 3.063 | 0.03024 | 1.2313 |
| 4.748                          | 0.3798                         | 7                                    | 28                               | 0.000001 | 0.17 | 15.754 | 0.00645 | 2.0005                      | 1.3472                  | 0.002382                | 0.041653                | 0.3 | 12     | 3.247 | 0.03024 | 1.2313 |
| 22.789                         | 0.3798                         | 2                                    | 21                               | 0.000001 | 0.17 | 14.539 | 0.00645 | 1.8240                      | 1.2438                  | 0.003266                | 0.031240                | 0.3 | 12     | 4.667 | 0.03024 | 1.2313 |
| 32.759                         | 0.3798                         | 2                                    | 21                               | 0.000001 | 0.17 | 13.867 | 0.00645 | 1.7265                      | 1.1731                  | 0.004695                | 0.031240                | 0.3 | 12     | 5.029 | 0.03024 | 1.2313 |
| 37.982                         | 0.3798                         | 2                                    | 21                               | 0.000001 | 0.17 | 13.516 | 0.00645 | 1.6754                      | 1.1345                  | 0.005444                | 0.031240                | 0.3 | 12     | 5.181 | 0.03024 | 1.2313 |
| 48.996                         | 0.3798                         | 1                                    | 21                               | 0.000001 | 0.17 | 12.774 | 0.00645 | 1.5676                      | 1.0515                  | 0.003511                | 0.031240                | 0.3 | 12     | 5.448 | 0.03024 | 1.2313 |
| 66.468                         | 0.3798                         | 1                                    | 21                               | 0.000001 | 0.17 | 11.597 | 0.00645 | 1.3967                      | 0.9204                  | 0.004764                | 0.031240                | 0.3 | 12     | 5.777 | 0.03024 | 1.2313 |
| 3.798                          | 0.3798                         | 14                                   | 21                               | 0.000001 | 0.17 | 15.818 | 0.00645 | 2.0098                      | 1.3508                  | 0.003811                | 0.031240                | 0.3 | 12     | 3.063 | 0.03024 | 1.2313 |
| 4.748                          | 0.3798                         | 7                                    | 21                               | 0.000001 | 0.17 | 15.754 | 0.00645 | 2.0005                      | 1.3472                  | 0.002382                | 0.031240                | 0.3 | 12     | 3.247 | 0.03024 | 1.2313 |
| 22.789                         | 0.3798                         | 2                                    | 14                               | 0.000001 | 0.17 | 14.539 | 0.00645 | 1.8240                      | 1.2438                  | 0.003266                | 0.020827                | 0.3 | 12     | 4.667 | 0.03024 | 1.2313 |
| 32.759                         | 0.3798                         | 2                                    | 14                               | 0.000001 | 0.17 | 13.867 | 0.00645 | 1.7265                      | 1.1731                  | 0.004695                | 0.020827                | 0.3 | 12     | 5.029 | 0.03024 | 1.2313 |
| 37.982                         | 0.3798                         | 2                                    | 14                               | 0.000001 | 0.17 | 13.516 | 0.00645 | 1.6754                      | 1.1345                  | 0.005444                | 0.020827                | 0.3 | 12     | 5.181 | 0.03024 | 1.2313 |
| 48.996                         | 0.3798                         | 1                                    | 14                               | 0.000001 | 0.17 | 12.774 | 0.00645 | 1.5676                      | 1.0515                  | 0.003511                | 0.020827                | 0.3 | 12     | 5.448 | 0.03024 | 1.2313 |
| 66.468                         | 0.3798                         | 1                                    | 14                               | 0.000001 | 0.17 | 11.597 | 0.00645 | 1.3967                      | 0.9204                  | 0.004764                | 0.020827                | 0.3 | 12     | 5.777 | 0.03024 | 1.2313 |
| 3.798                          | 0.3798                         | 14                                   | 14                               | 0.000001 | 0.17 | 15.818 | 0.00682 | 2.0098                      | 1.3508                  | 0.003811                | 0.020827                | 0.3 | 12     | 3.063 | 0.03024 | 1.2313 |
| 4.748                          | 0.3798                         | 7                                    | 14                               | 0.000001 | 0.17 | 15.754 | 0.00645 | 2.0005                      | 1.3472                  | 0.002382                | 0.020827                | 0.3 | 12     | 3.247 | 0.03024 | 1.2313 |



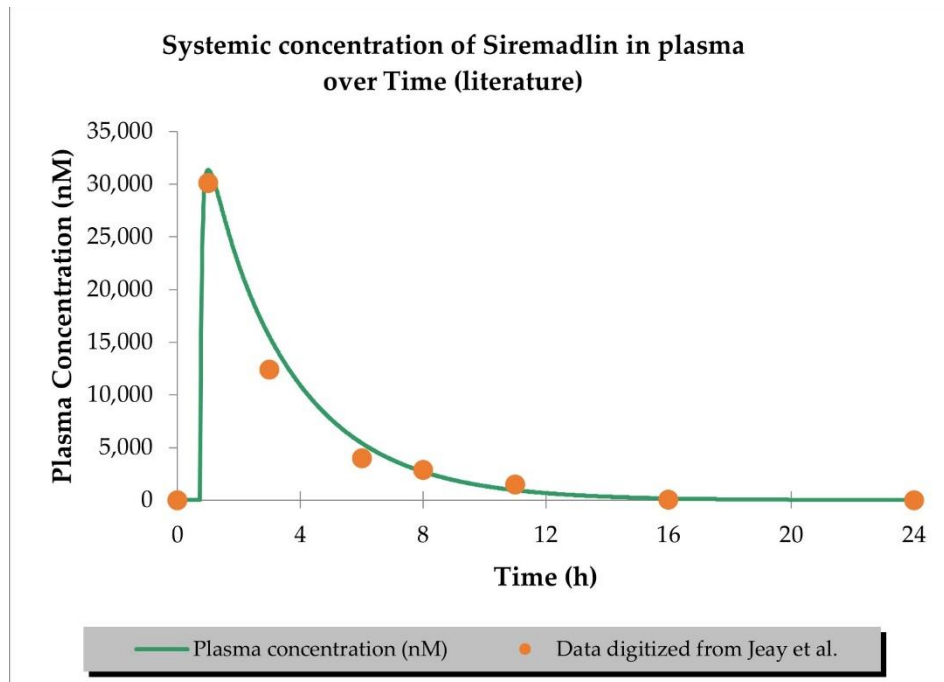

Figure S1. PBPK model of siremadlin verified with literature data (data digitized from Jeay et al. [2]).

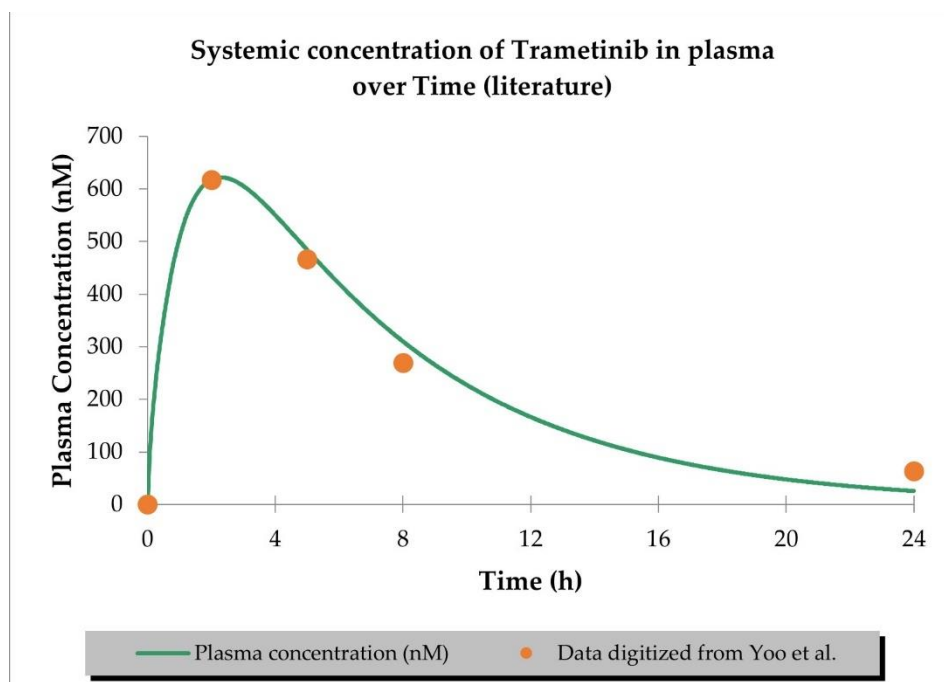

Figure S2. PBPK model of trametinib verified with literature data (data digitized from Yoo et al. [4]).

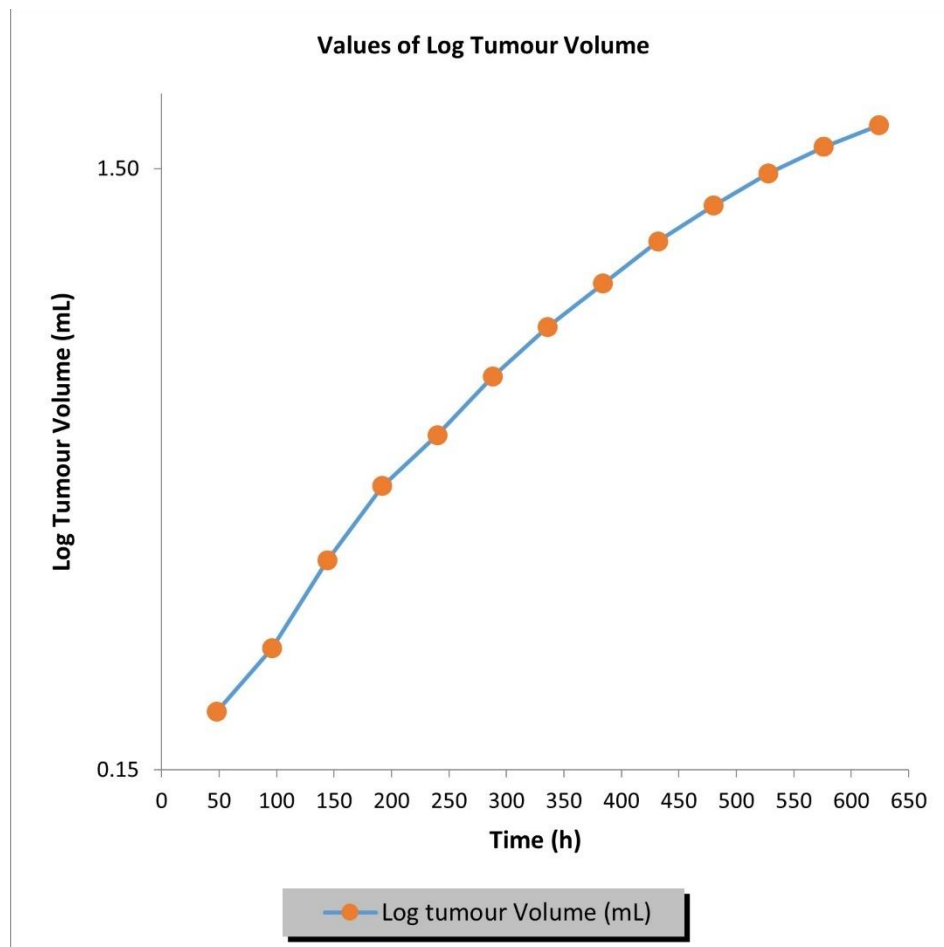

**Figure S3.** Logarithmic A375 tumour volume in time showing a clear trend of tumour growth saturation after vehicle administration. Observed data are means from  $n = 11$ .

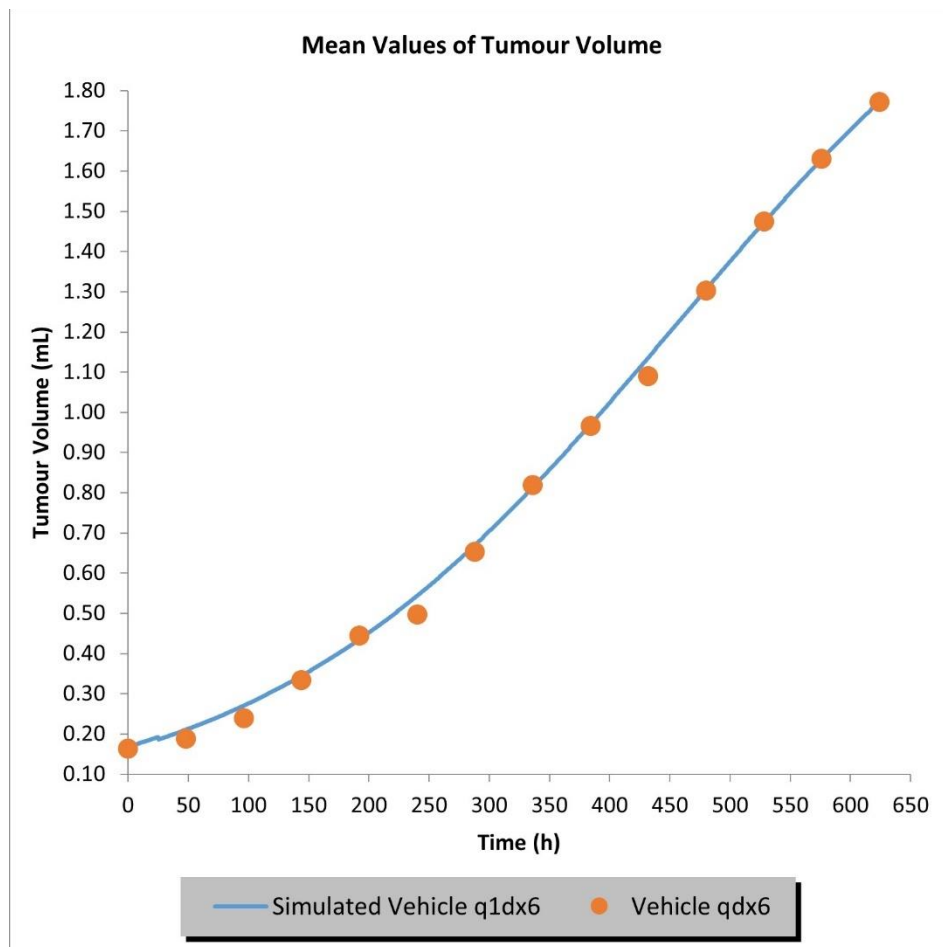

**Figure S4.** Logistic A375 tumour growth model, after vehicle administration. Observed data are means from  $n = 11$ .

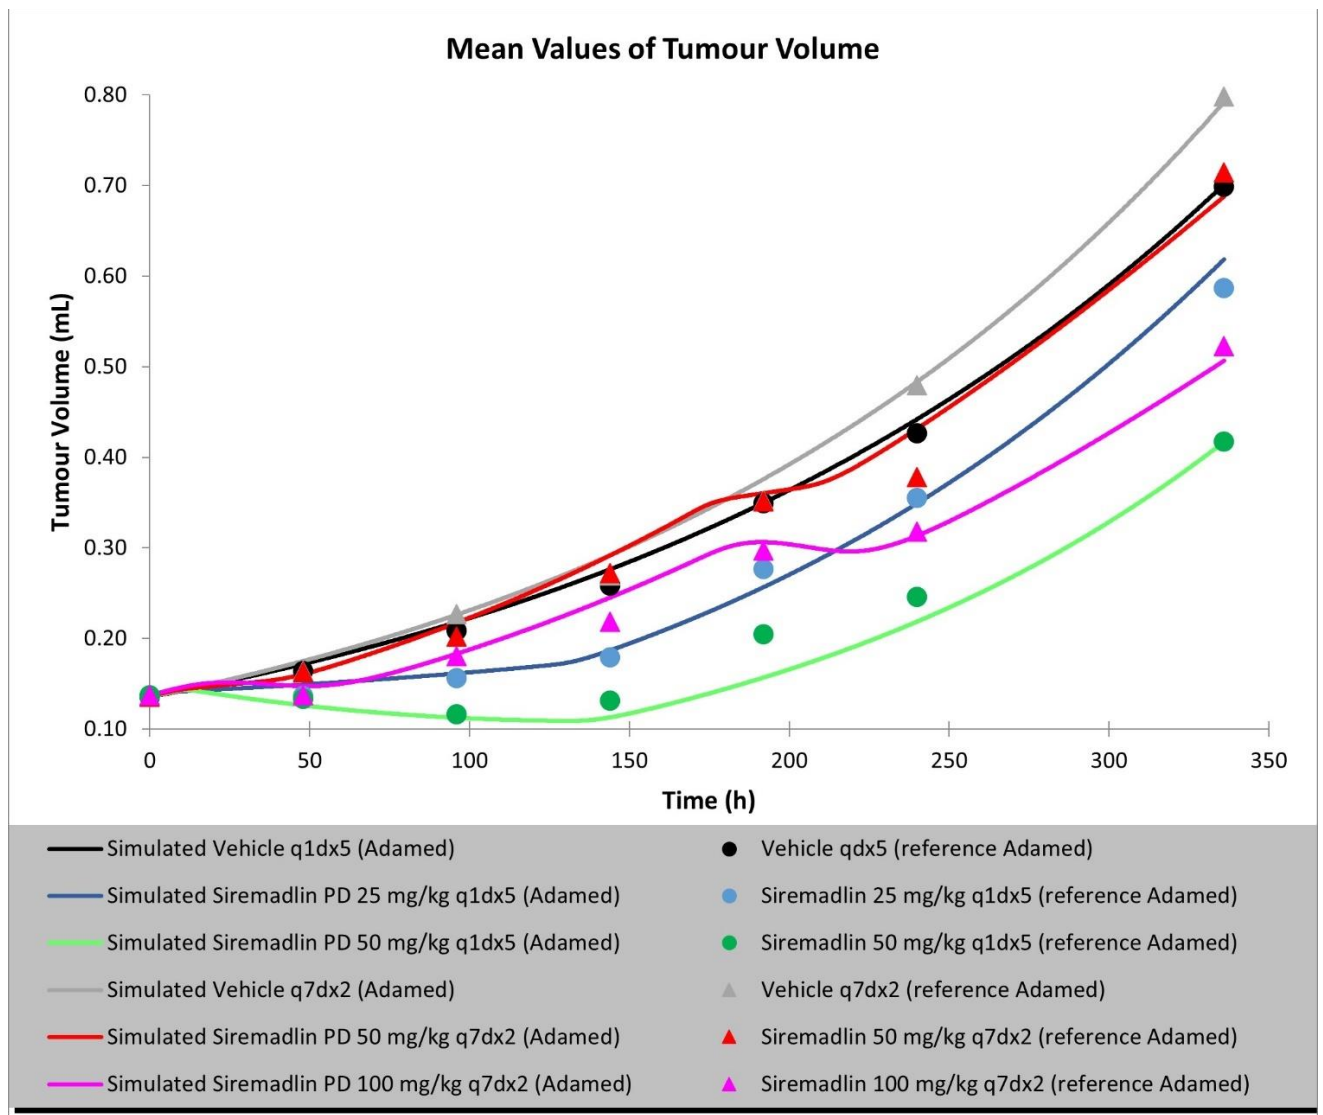

**Figure S5.** TGI models of siremadlin from Adamed Pharma verification dataset. Observed data are means from  $n = 5$ .

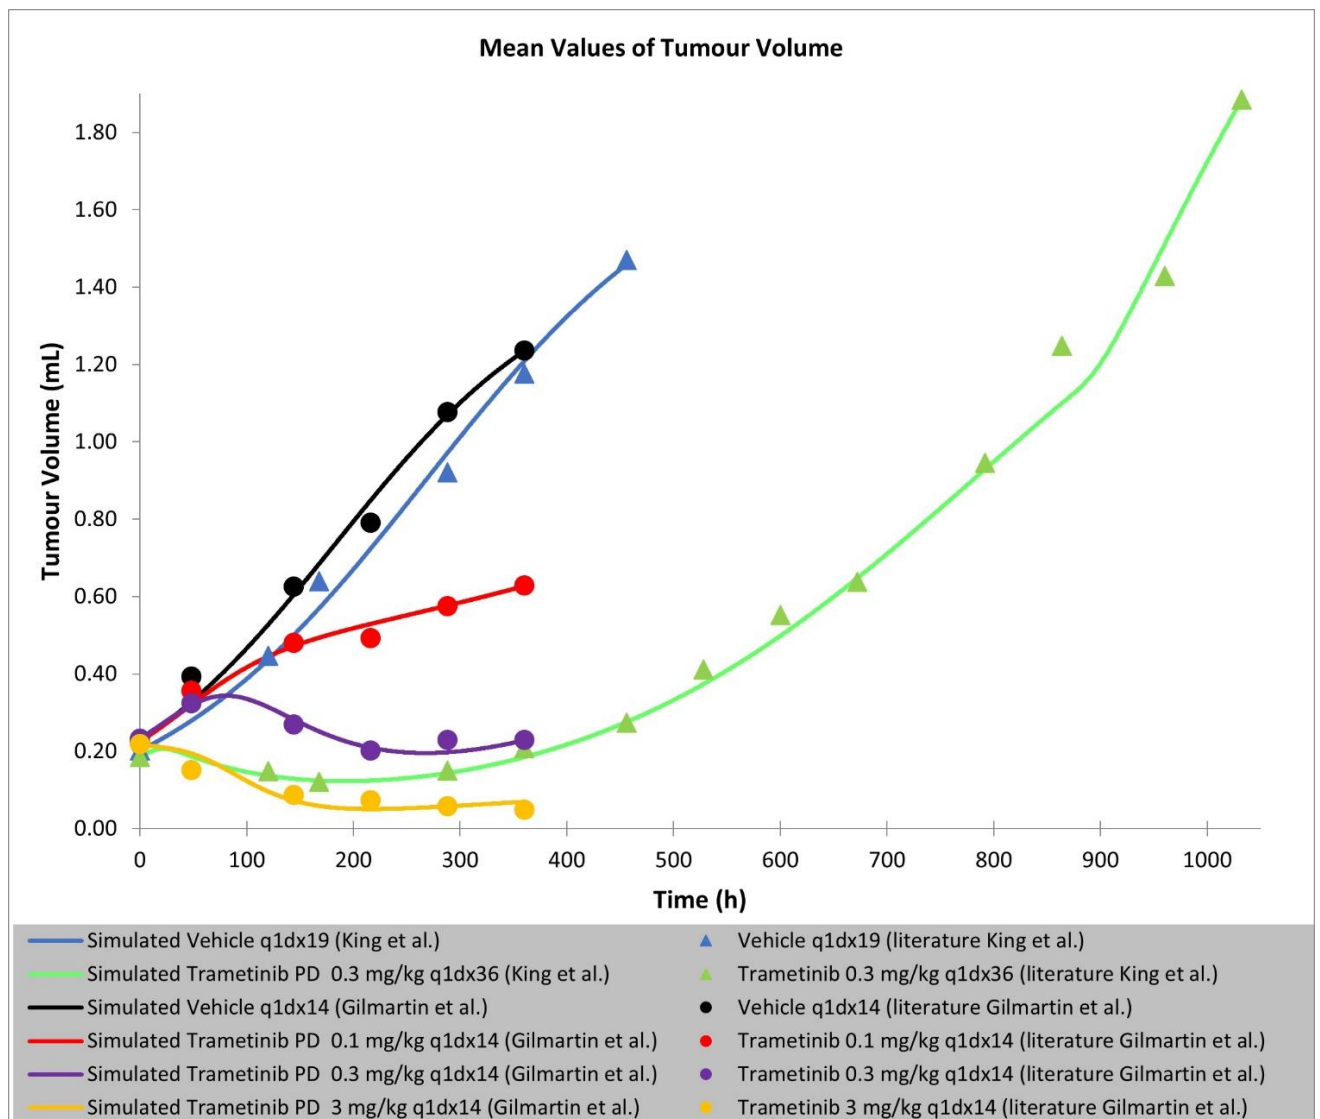

**Figure S6.** TGI models of trametinib from literature verification datasets: 0.3 mg/kg qdx36 (data digitized from King et al. [8]), 0.1/0.3/3 mg/kg qdx14 (data digitized from Gilmartin et al. [9]).

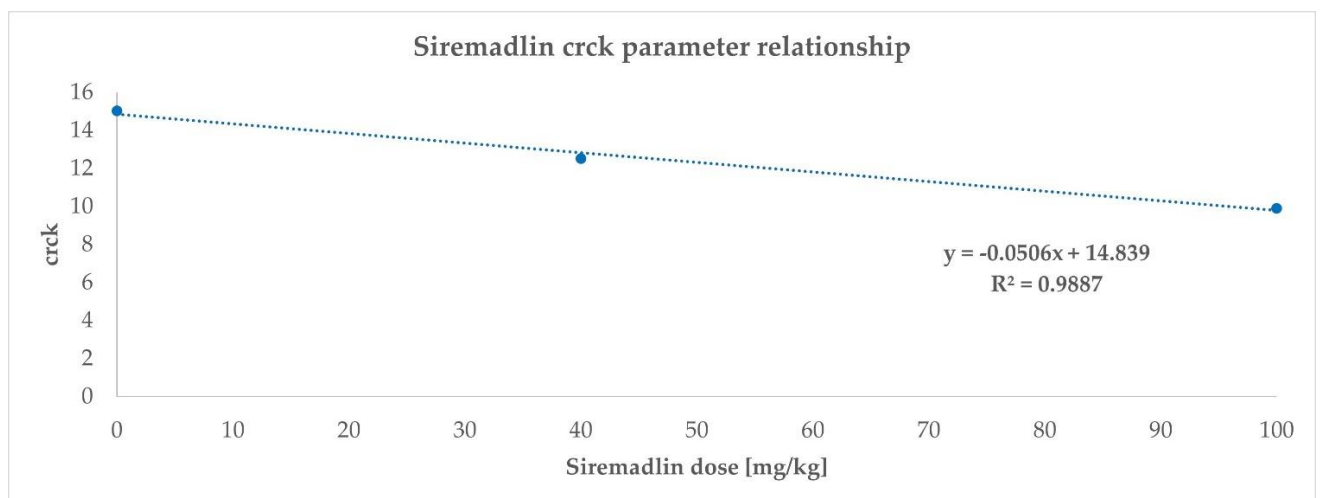

**Figure S7.** Siremadlin crck parameter relationship in universal TGI model.

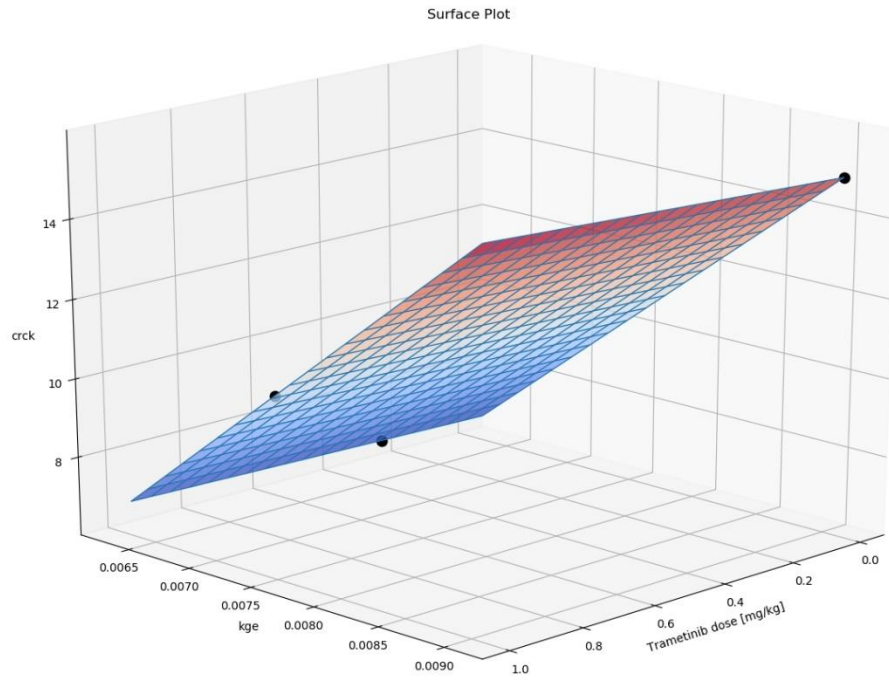

**Figure S8.** Trametinib crck parameter relationship in universal TGI model.

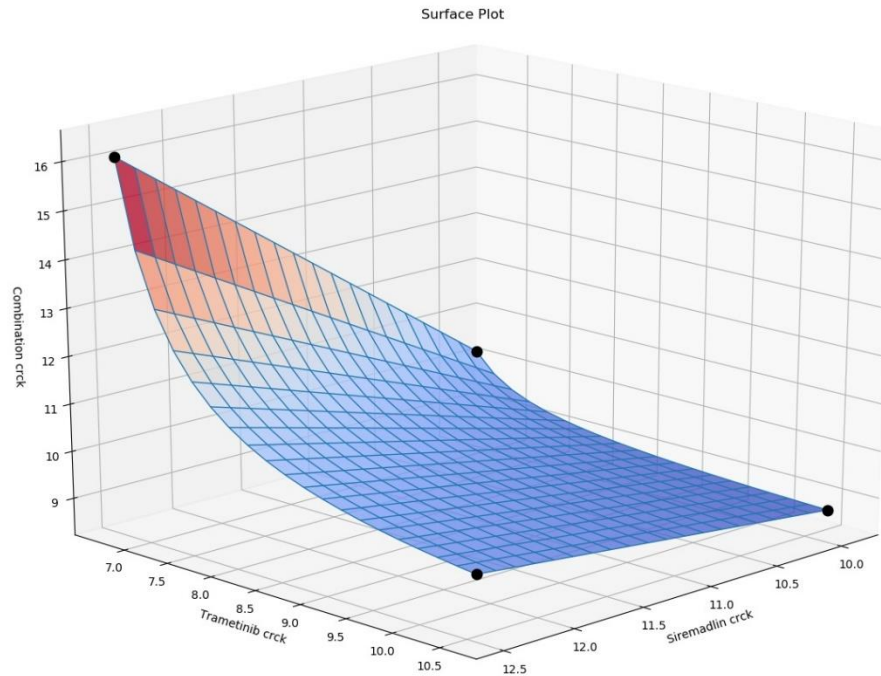

**Figure S9.** Siremadlin and trametinib combination crck parameter relationship in universal TGI model.

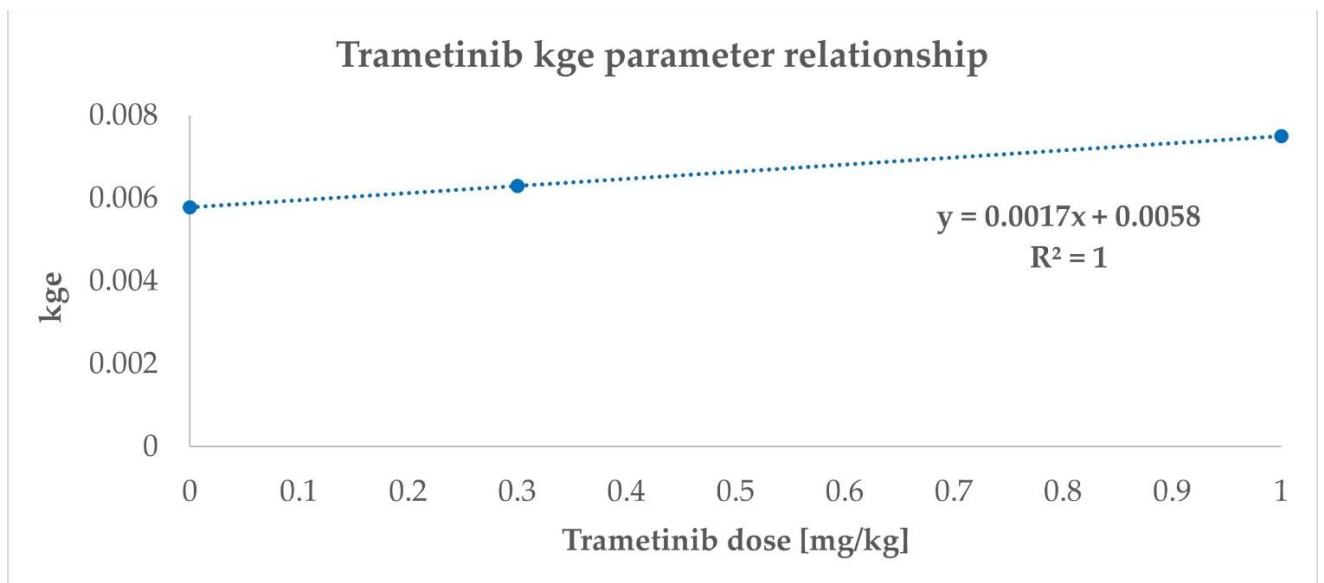

**Figure S10.** Trametinib kge parameter relationship in universal TGI model.

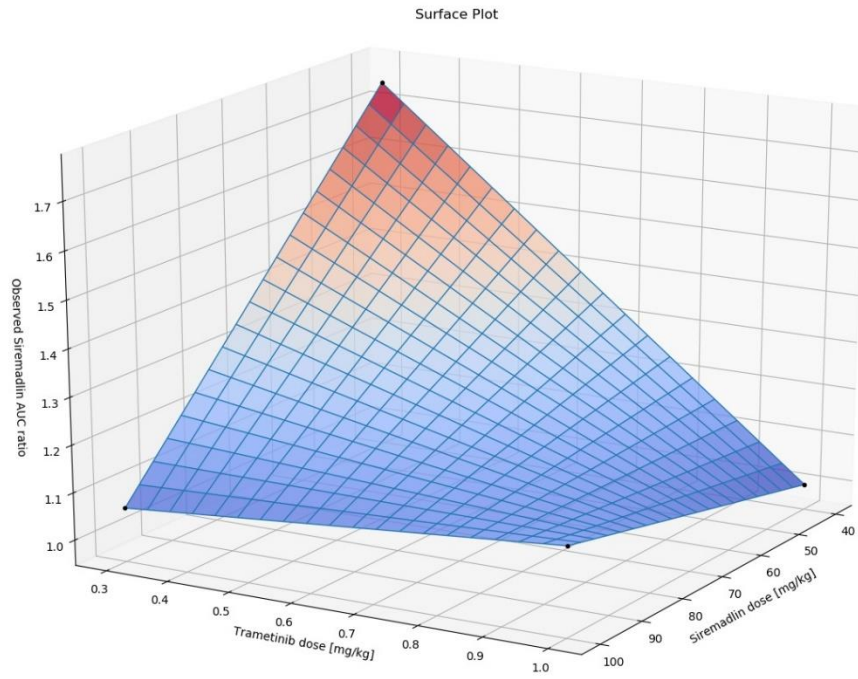

**Figure S11.** Siremadlin exposure ratio parameter relationship in universal TGI model.



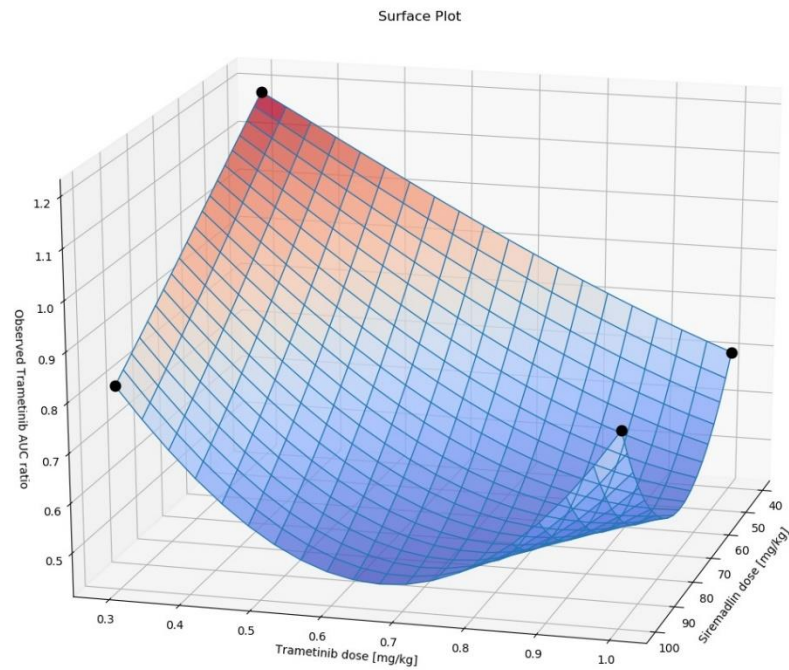

**Figure S12.** Trametinib exposure ratio parameter relationship in universal TGI model.

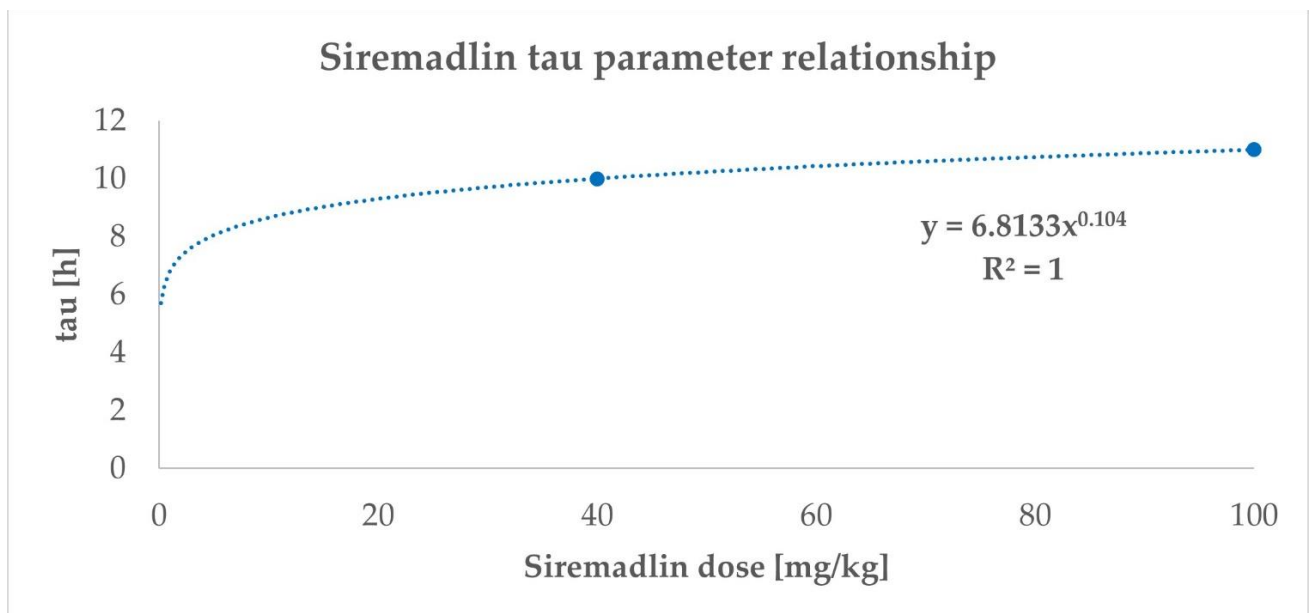

**Figure S13.** Siremadlin tau parameter relationship in universal TGI model.

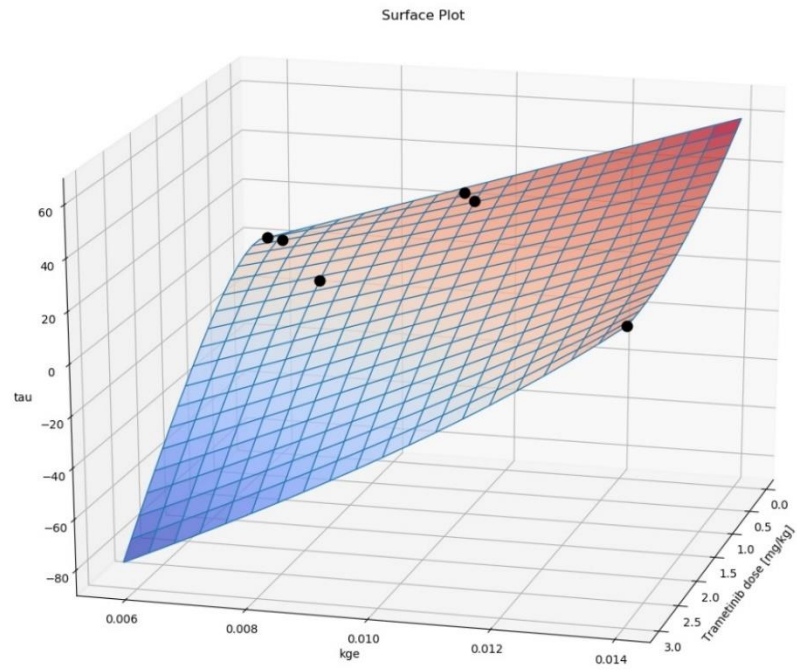

**Figure S14.** Trametinib tau parameter relationship in universal TGI model.

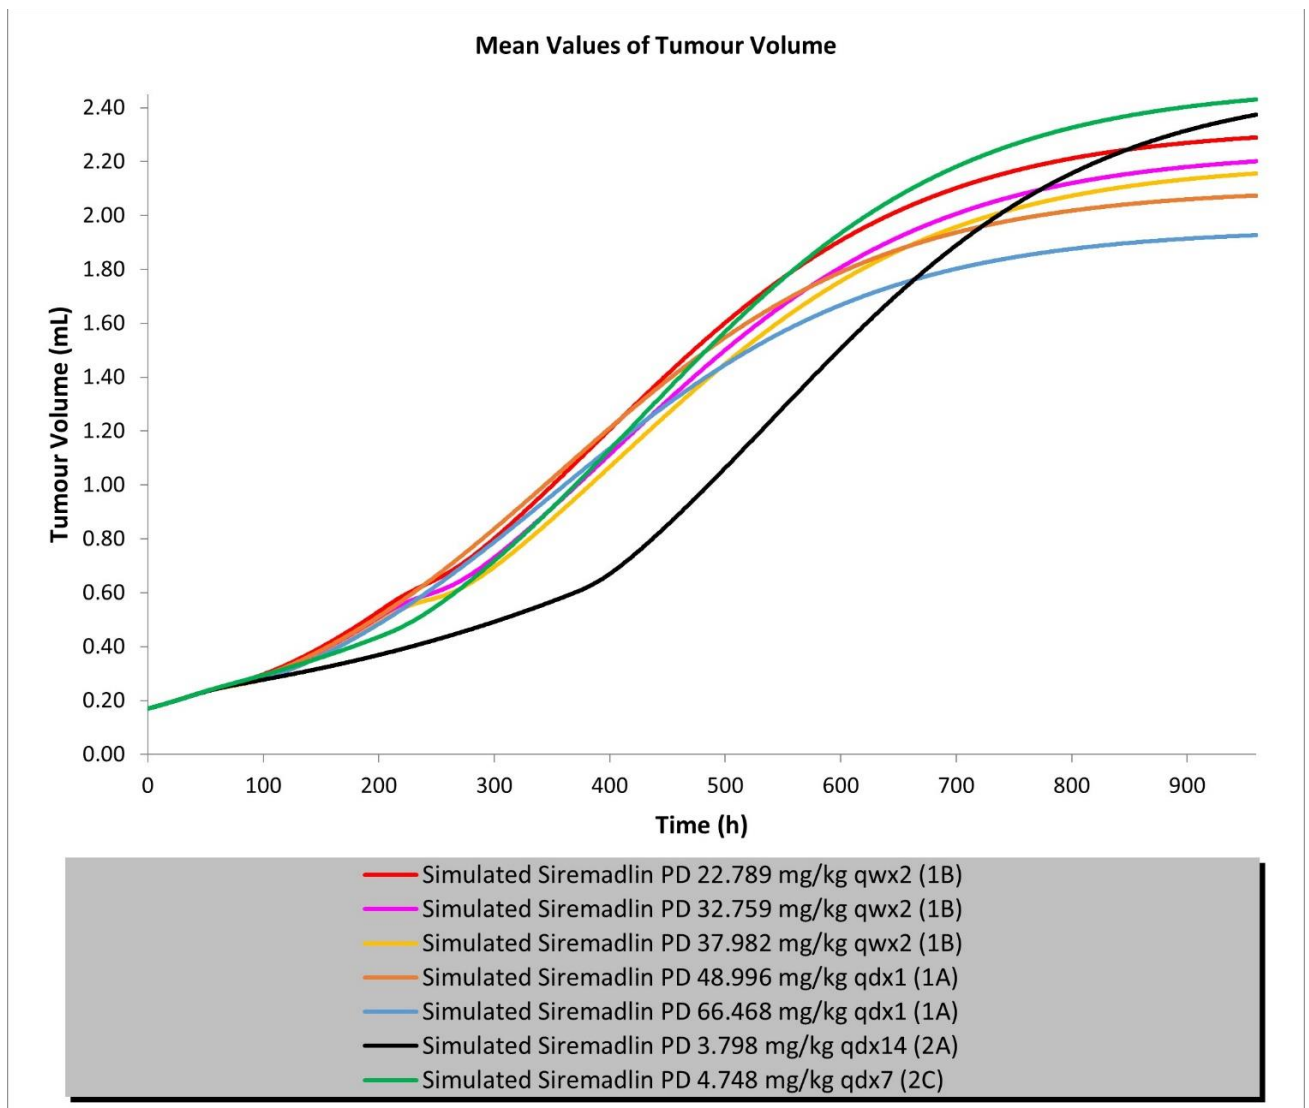

**Figure S15.** Simulation of siremadlin efficacy at HED doses (1 therapy cycle).

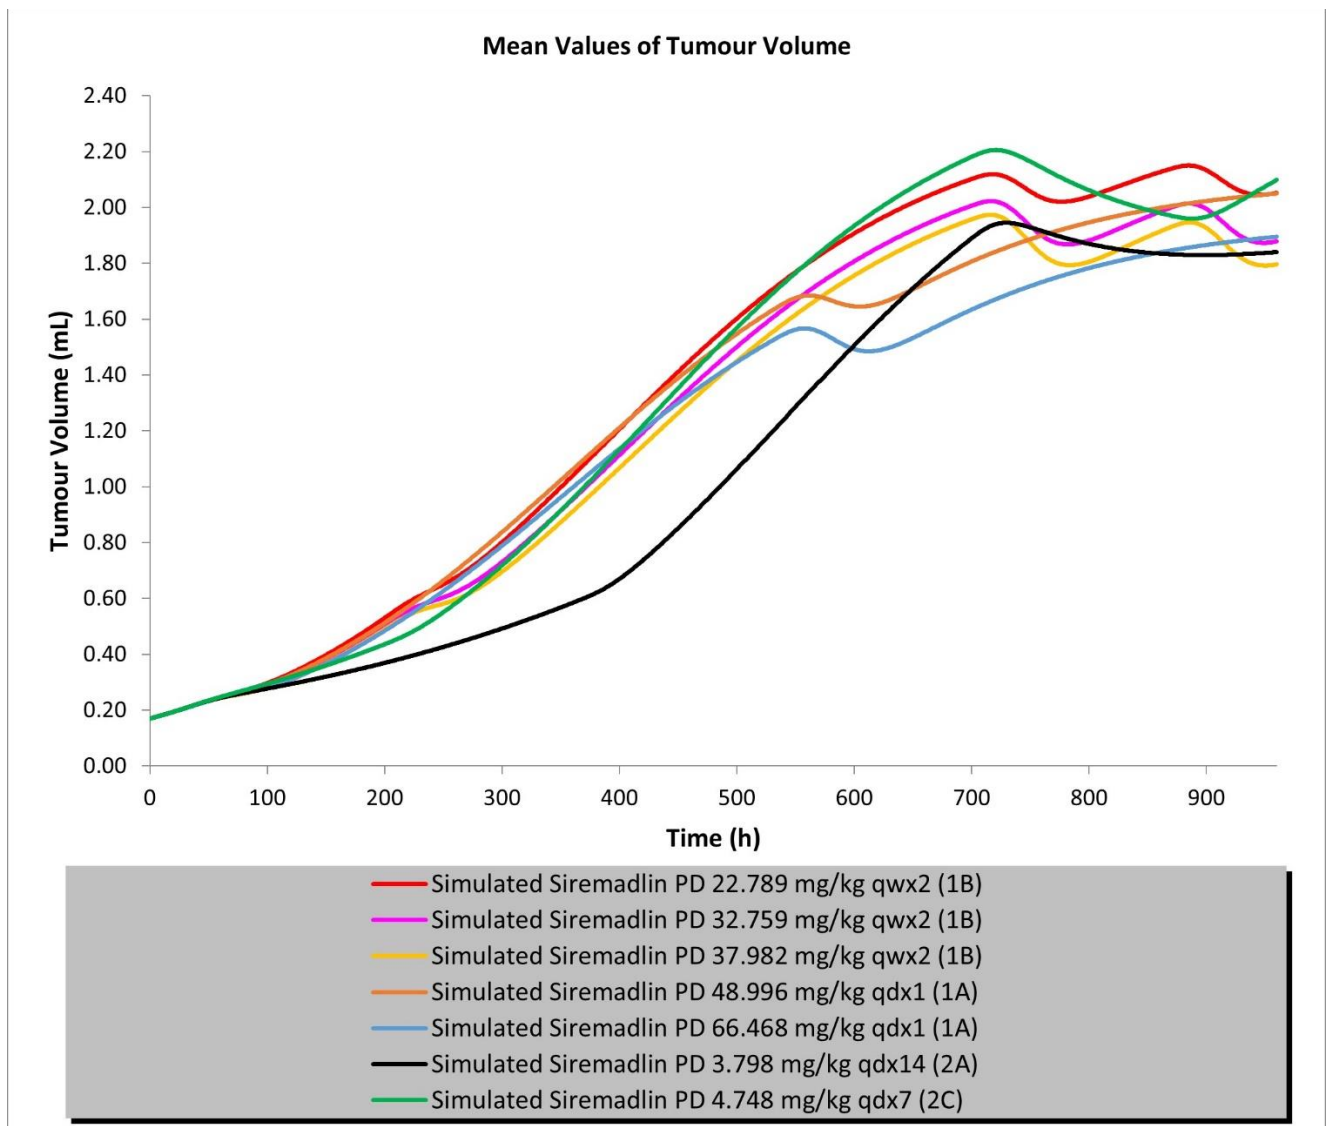

**Figure S16.** Simulation of siremadlin efficacy at HED doses (2 therapy cycles).

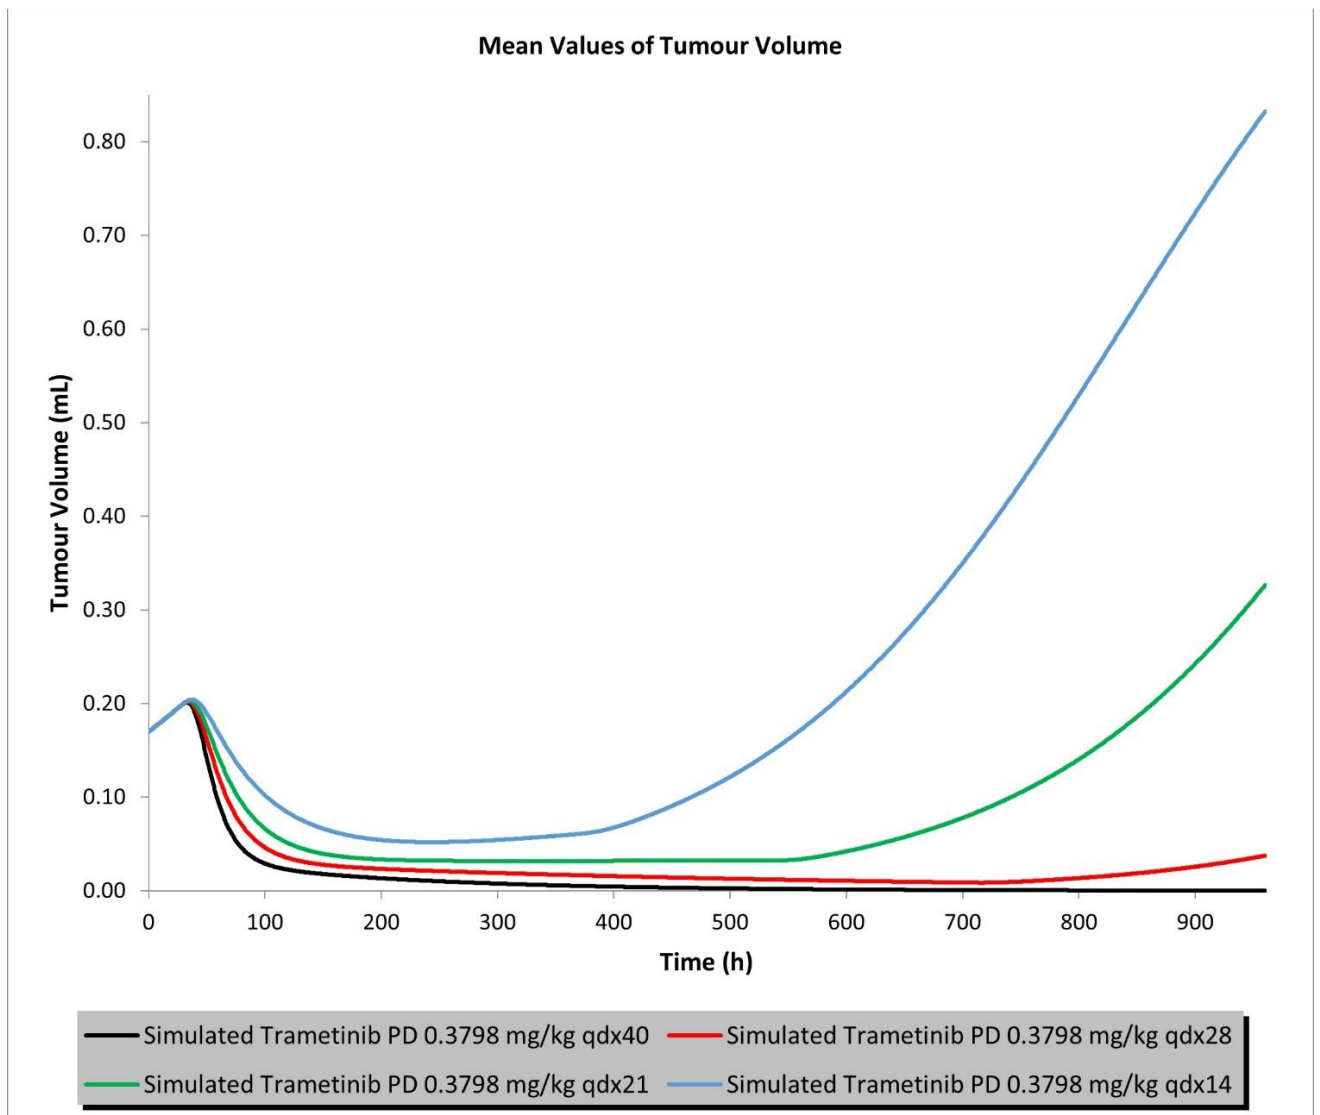

**Figure S17.** Simulation of trametinib efficacy at HED doses (1 therapy cycle).

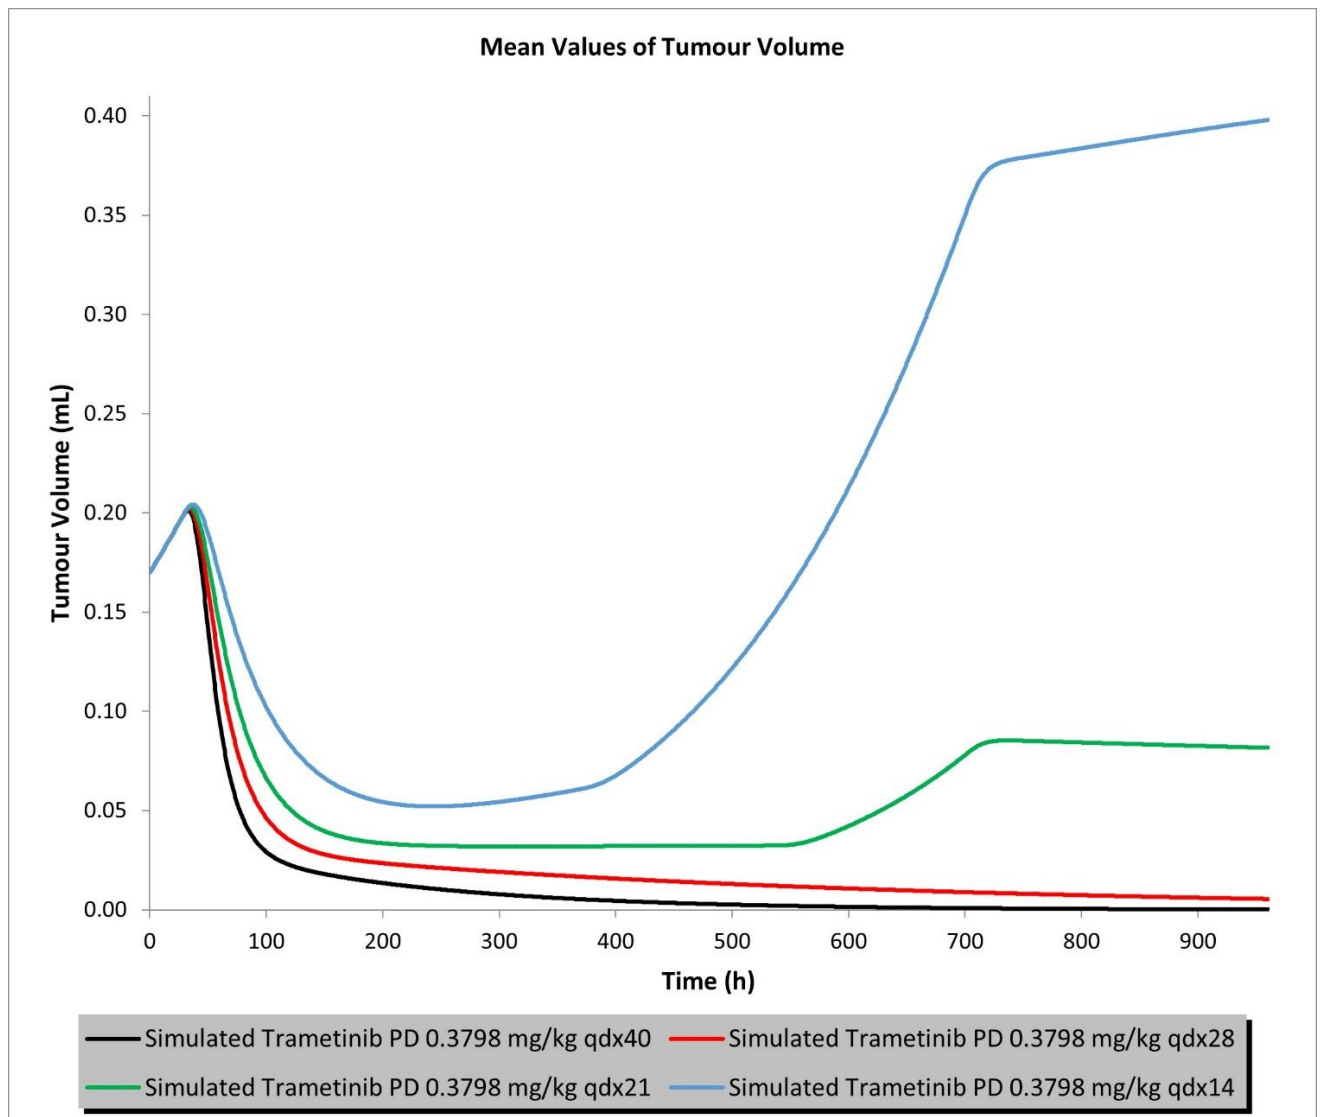

**Figure S18.** Simulation of trametinib efficacy at HED doses (2 therapy cycles).

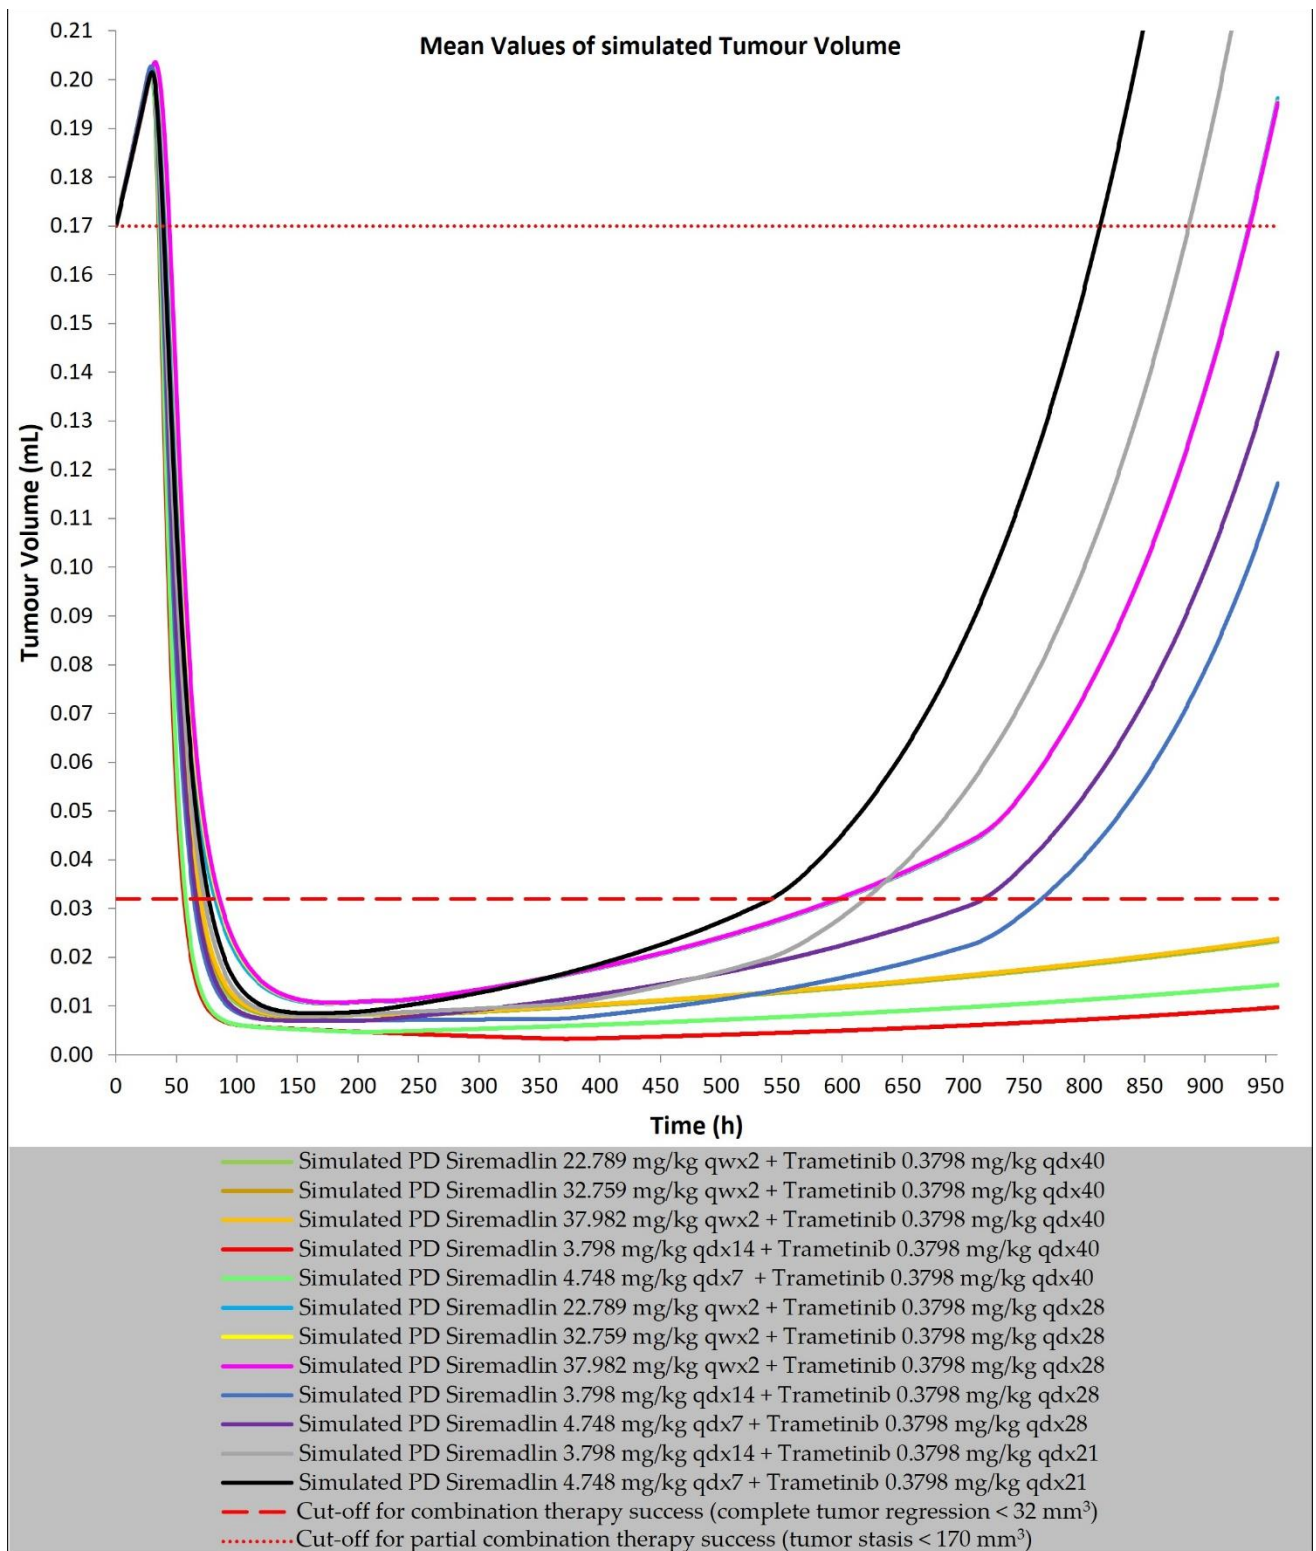

**Figure S19.** Simulation of siremadlin+trametinib combination efficacy at HED doses (1 therapy cycle).



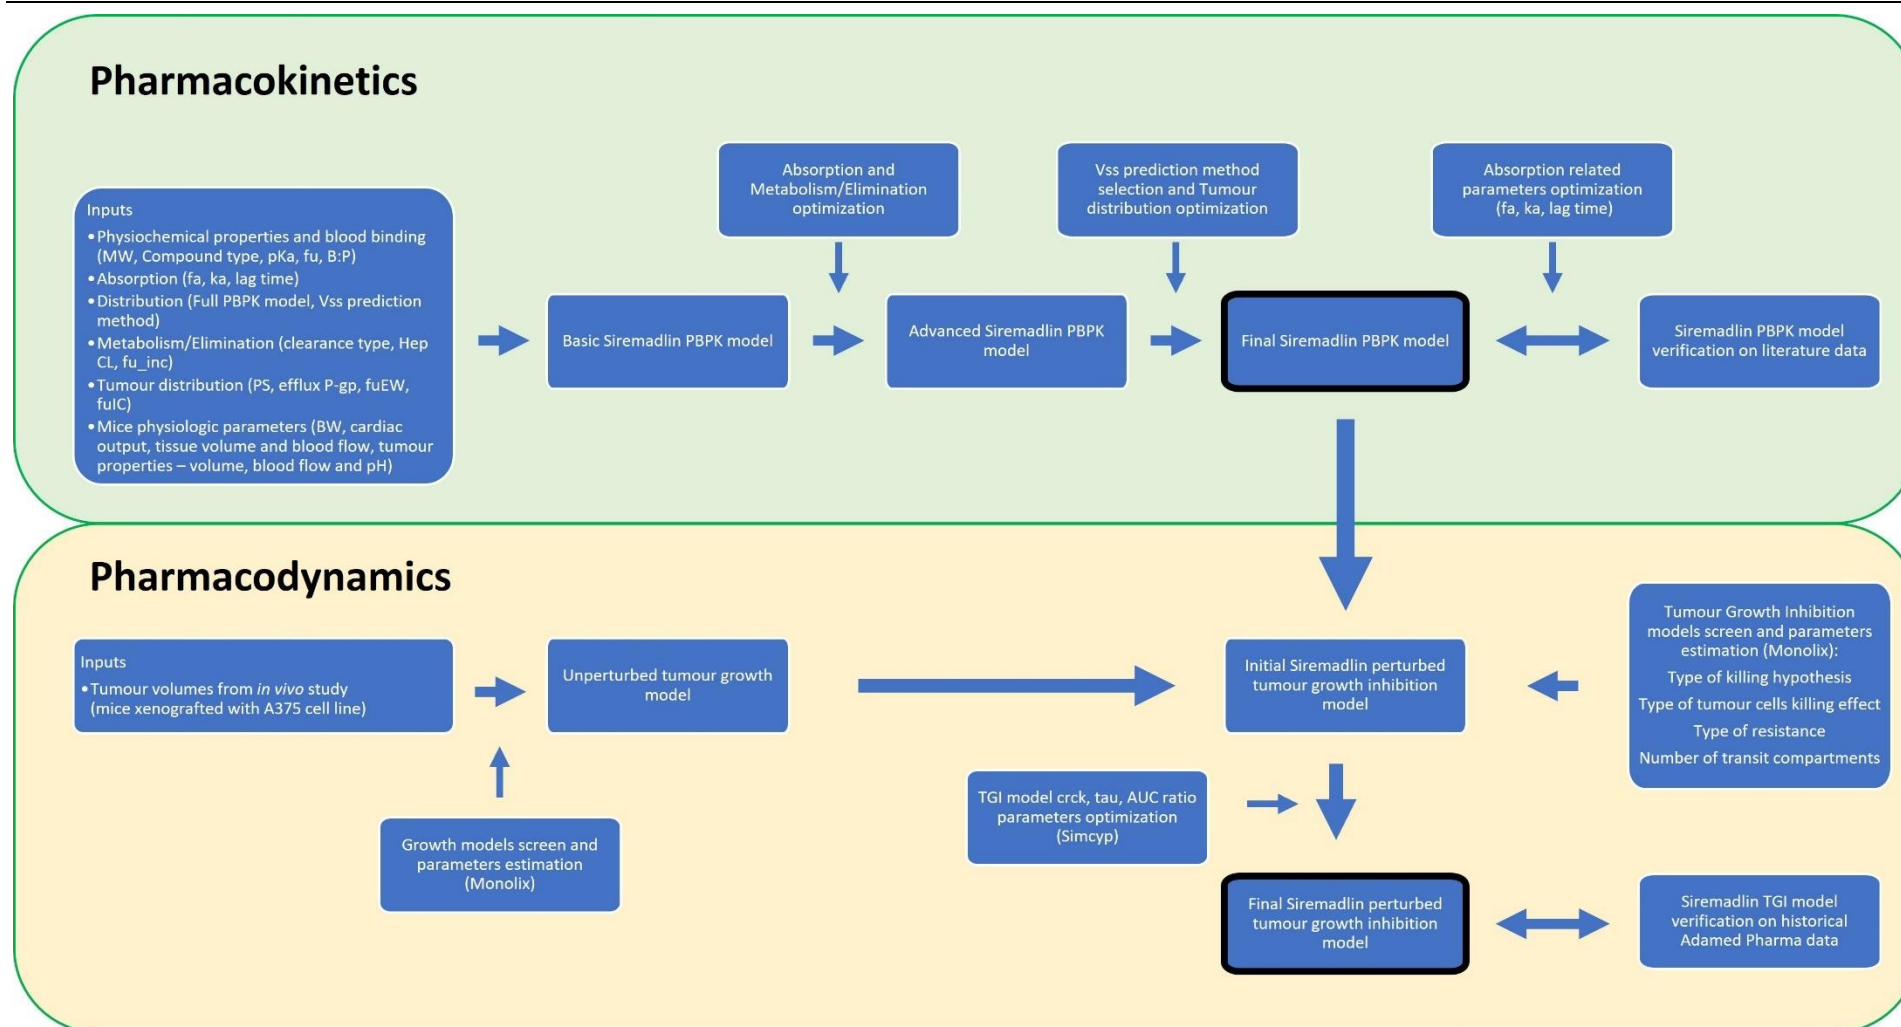

Figure S20. PBPK/PD model building workflow for siremadlin.



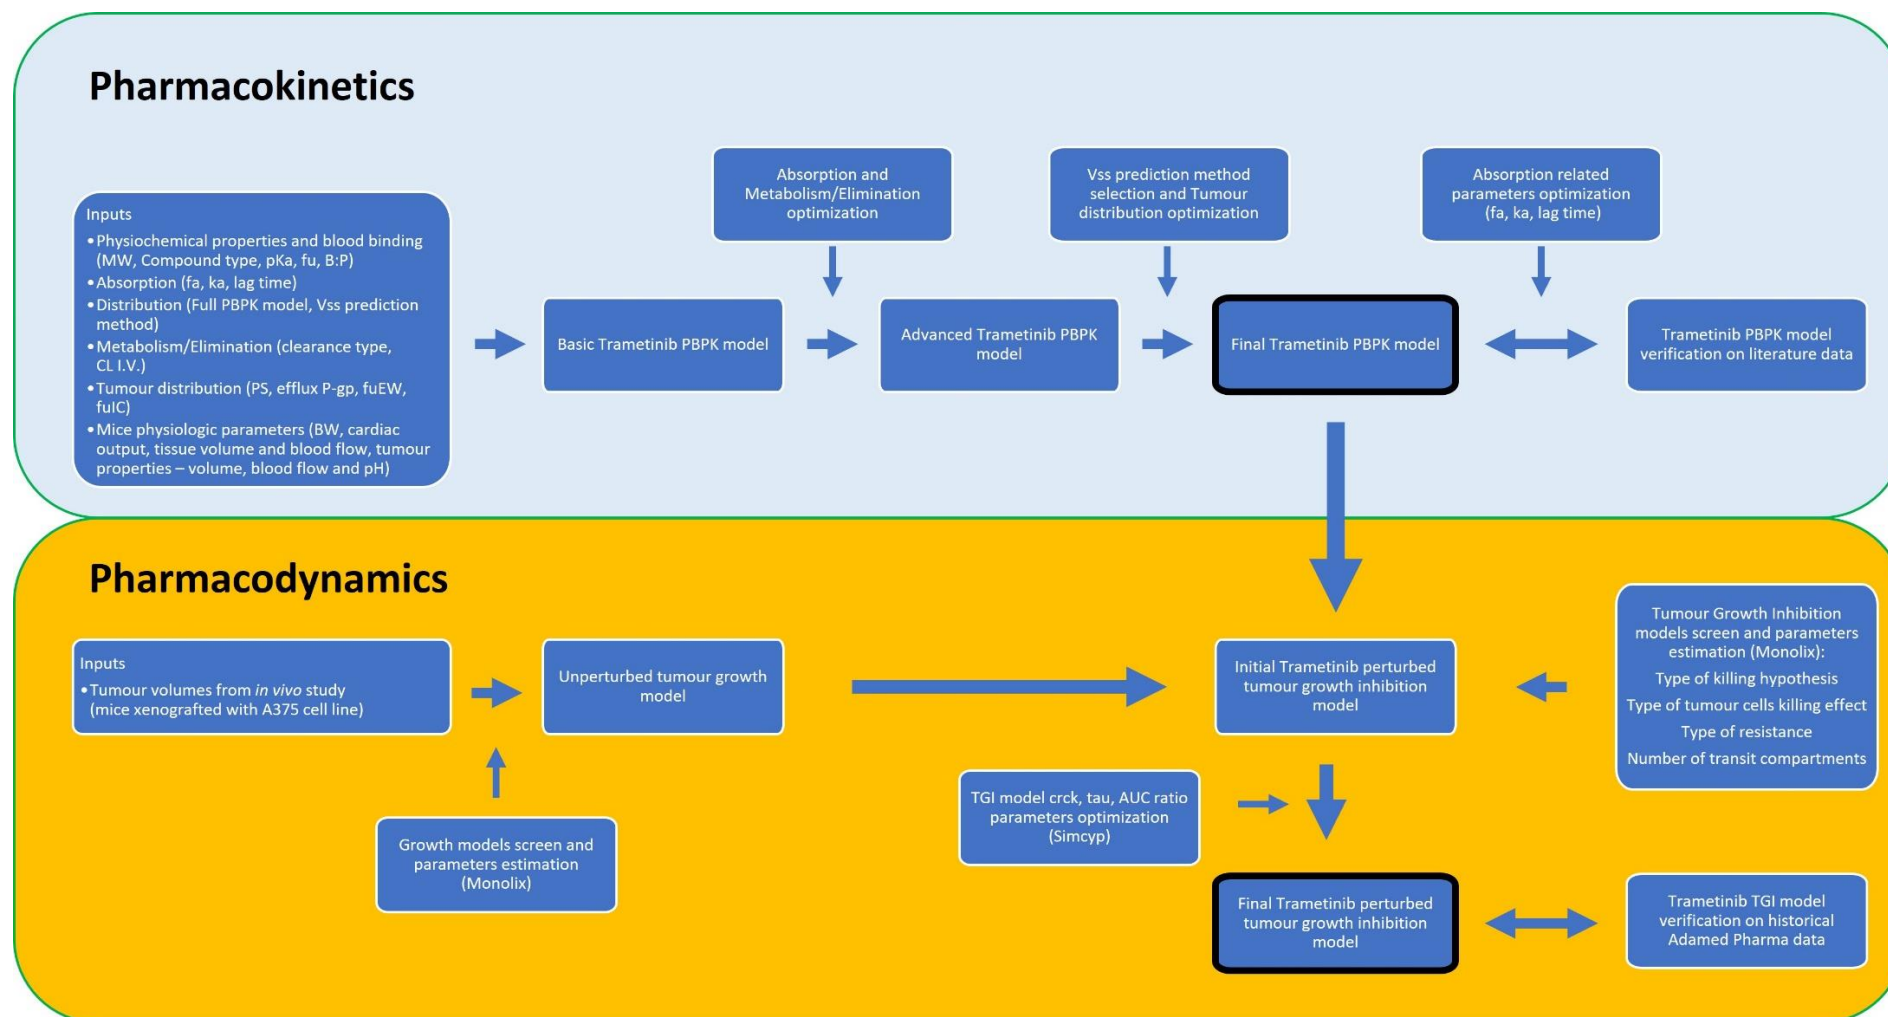

Figure S21. PBPK/PD model building workflow for trametinib.

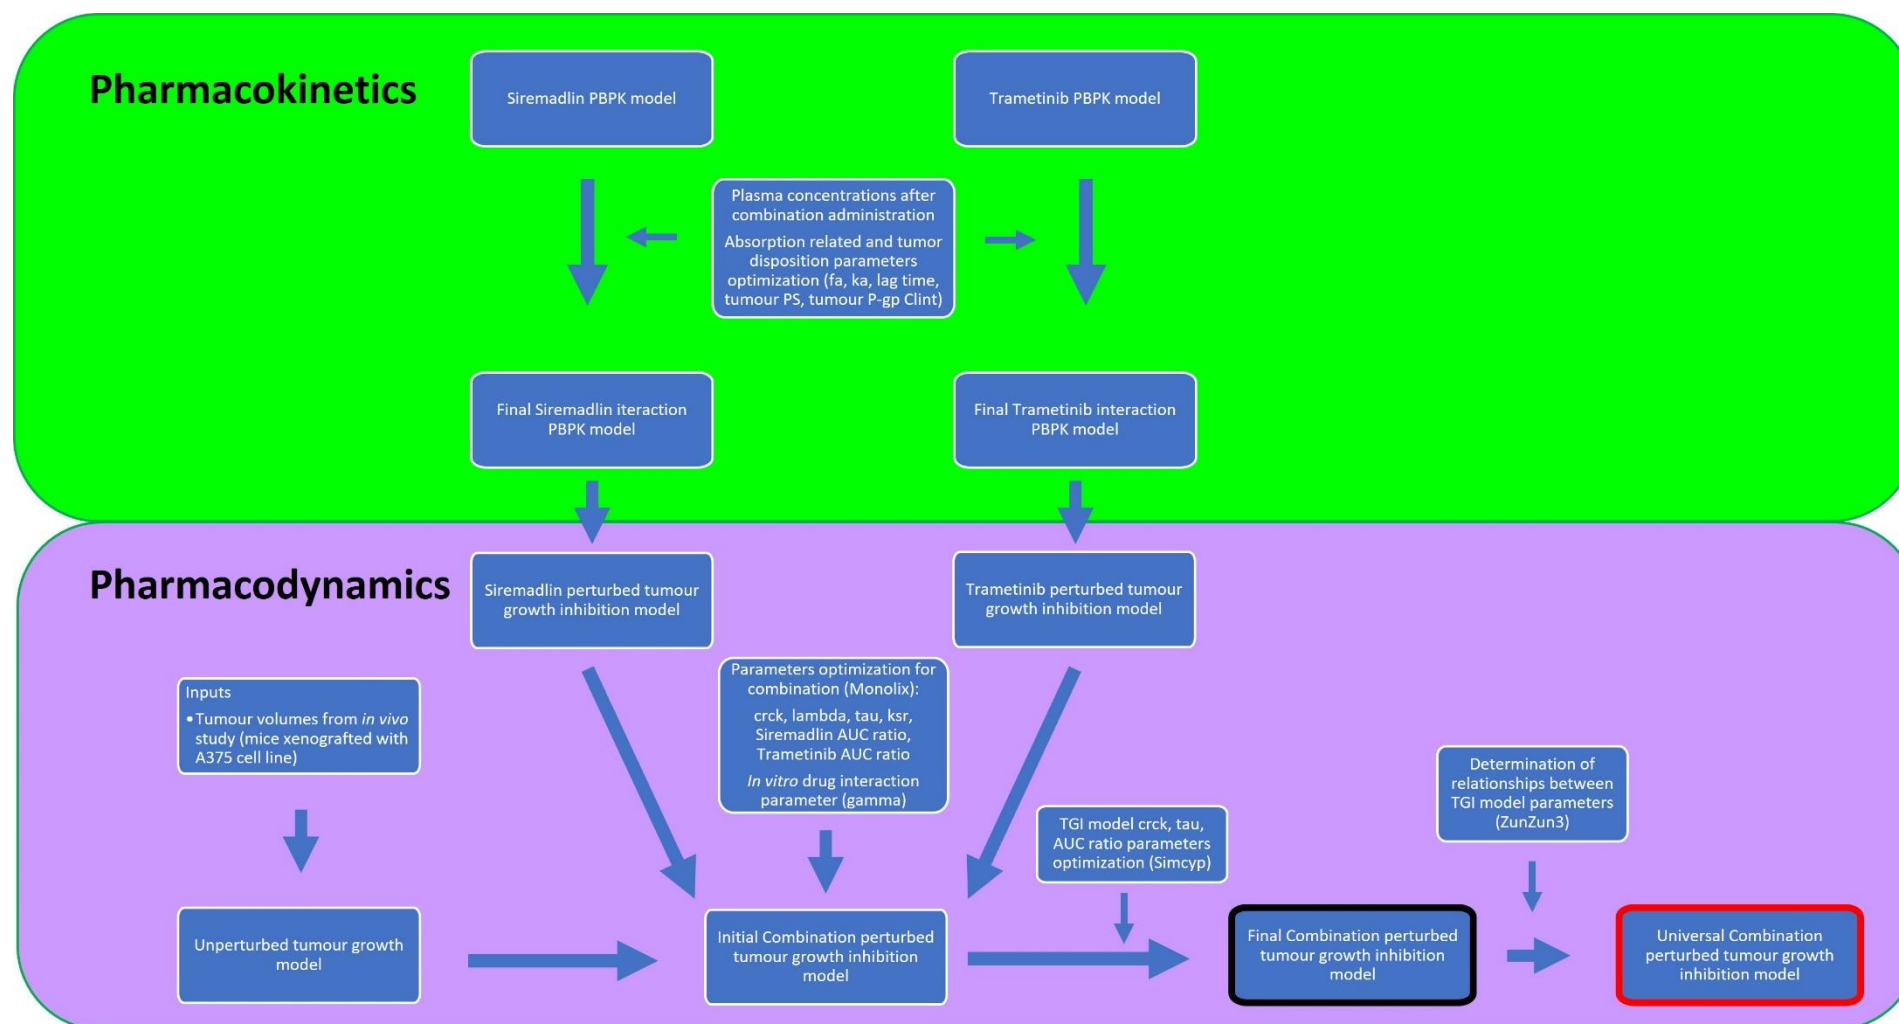

**Figure S22.** PBPK/PD model building workflow for simeadlin and trametinib drug combination.

---

**Code S1.** Mlxtran code for tumour growth inhibition model for drug combination (siremadlin + trametinib combination 100+1 mg/kg).

DESCRIPTION: Drug combination TGI model.

Model for TS (tumour size):

- Tumour growth follows a logistic model. This model assumes an exponential growth rate (kge) which decelerates linearly with respect to the tumour size. This results in sigmoidal dynamics - with an initial exponential growth phase followed by a growth-saturated phase as the tumour reaches its carrying capacity (T<sub>Smax</sub>). The initial tumour size is TS<sub>0</sub>.

Tumour growth inhibition model:

- Tumour growth inhibition model using a log-kill killing hypothesis where the treatment effect follows exponential kill kinetics ( $k_{kill} * (1 - \exp(-s * EXPOSURE))$ ).
- A delay in treatment effect has been added by the introduction of 4 signal transit compartments (K<sub>1</sub>, K<sub>2</sub>, K<sub>3</sub>, K<sub>4</sub>). The duration of this delay is determined by the parameter tau.

Treatment:

- The treatment effect is based on EXPOSURE, which is the pharmacokinetics of the treatment modelled using the pkmodel macro.

[LONGITUDINAL]

input = {TS<sub>0</sub>, TS<sub>r0</sub>, crck, kge, s, lambda, tau, ksr, gamma, AUC\_ratio\_Siremadlin, AUC\_ratio\_TRA}

TS<sub>0</sub> = {use=regressor}

PK:

;Siremadlin (PK parameters assume PK interaction during the first 96h. PK estimates from 2 compartmental models including introduction of lag time, first order absorption process and linear clearance)

Tlag\_Siremadlin = 0.000001

ka\_Siremadlin = 0.88555

Cl\_Siremadlin = 0.0012175

V1\_Siremadlin = 0.002802

Q\_Siremadlin = 530.58255

V2\_Siremadlin = 0.003598

compartment(cmt = 1, volume=V1\_Siremadlin, concentration=C\_Siremadlin)

absorption(adm=1, cmt=1, ka=ka\_Siremadlin, Tlag = Tlag\_Siremadlin)

elimination(cmt=1, Cl=Cl\_Siremadlin)

peripheral(k12=Q\_Siremadlin/V1\_Siremadlin, k21=Q\_Siremadlin/V2\_Siremadlin)

;TRAMETINIB (PK parameters assume PK interaction during the first 96h. PK estimates from 2 compartmental models including introduction of lag time, first order absorption process and linear clearance)

Tlag\_TRA = 0.5122

ka\_TRA = 0.6863

Cl\_TRA = 0.00023

---

```

V1_TRA = 0.0009
Q_TRA = 0.00002200
V2_TRA = 0.00019
compartment(cmt = 3, volume=V1_TRA, concentration=C_TRA)
absorption(adm=2, cmt=3, ka=ka_TRA, Tlag = Tlag_TRA)
elimination(cmt=3, Cl=Cl_TRA)
peripheral(k34=Q_TRA/V1_TRA, k43=Q_TRA/V2_TRA)
;Exposure in drug combination
EXPOSURE = C_Siremadlin+C_TRA

```

EQUATION:

```

odeType=stiff
TSmax = crck*(TS0+TSr0)

```

```

TS_0 = TS0
TSr_0 = TSr0
K1_0 = 0
K2_0 = 0
K3_0 = 0
K4_0 = 0

```

```

kkill_Siremadlin = 0.0215
kkill_TRA = 0.0235
kkill_combined = (kkill_Siremadlin *AUC_ratio_Siremadlin + kkill_TRA *AUC_ratio_TRA)
if t>=96
    kkill = kkill_TRA
else
    kkill = kkill_combined * gamma
end

```

```

; Signal distribution
dK = (kkill*(1-exp(-s*EXPOSURE)))
ddt_K1 = (dK-K1)/tau
ddt_K2 = (K1-K2)/tau
ddt_K3 = (K2-K3)/tau
ddt_K4 = (K3-K4)/tau

```

```

TotalTS = TS+TSr

```

```

;Saturation for TS and TSr at 1e12 to avoid infinite values
if TS>1e12 | TSr>1e12
    TSDynamics = 0

```

```

TSrDynamics = 0
else
  TSDynamics = (kge*TS*(1-(TotalTS/TSmax))) - (K4+ksr*K4)*TS
  TSrDynamics = (kge*TSr*(1-(TotalTS/TSmax))) + (ksr*K4*TS) - (K4/lambda*TSr)
end

```

```

ddt_TS = TSDynamics ; Treatment-sensitive cell population
ddt_TSr = TSrDynamics ; Treatment-resistant cell population

```

OUTPUT:

```

output = {TotalTS}

```

**Code S2.** Lua code for the drug interaction model (siremadlin + trametinib combination 100+1 mg/kg).

```

function popSimSetup(...)
  return 0
end

function odeInitStep(xin, su, P, ...)
  return 0
end

function odeRateStep(t, xin, su, gu, P, ...)
  --Substrate (Siremadlin) properties with no PK interaction
  local faSub = 0.60231 -- substrate fraction absorbed (%)
  local kaSub = 0.31 -- substrate absorption rate constant (1/h)
  --Metabolite (Trametinib) properties with no PK interaction
  local faMet = 0.7247 -- metabolite fraction absorbed (%)
  local kaMet = 1.25 -- metabolite absorption rate constant (1/h)
  local tlagMet = 0.85 -- metabolite lag time (h)
  --Dosing schedules
  local DosingTimesSubstrate = {24, 48, 72} -- substrate dosing qdx3 (h)
  local DosingTimesMetabolite = {24, 48, 72, 96, 120, 144} -- metabolite dosing qdx6 (h)
  local CoadministrationTimes = {24, 48, 72} -- co-administration times (h)

  for i=1,3
  do
    if (t>=CoadministrationTimes[i] and t<=96)
    then
      --Substrate (Siremadlin) properties with PK interaction
      kaSub = 0.65
      --Metabolite (Trametinib) properties with PK interaction
      faMet = 0.6407
      kaMet = 0.357
      tlagMet = 0
    end

    local doseSub = 4.96029960 --Siremadlin 100 mg/kg dose in uM adjusted to mice mass 27.55g
    local doseMet = 0.04476836 --Trametinib 1 mg/kg dose in uM adjusted to mice mass 27.55g
    local vLiv = 0.00119 --mouse liver volume in (L)
    local Qpv = 0.16578072 --portal vein blood flow l/h
  end
end

```

```

local BPsub = 0.76 --Siremadlin blood to plasma ratio
local BPmet = 0.7 --Trametinib blood to plasma ratio
local RateInSub = 0 --Substrate dosing rate (uM/h)
local RateInMet = 0 --Metabolite dosing rate (uM/h)

for i=1,3 --substrate dosing according to the schedule
do
if (t>DosingTimesSubstrate[i])
then
RateInSub = RateInSub + doseSub*kaSub*faSub*math.exp(- kaSub * (t-DosingTimesSubstrate[i]))
end
end

for j=1,6 --metabolite dosing according to the schedule
do
if (t>(DosingTimesMetabolite[j]+tlagMet))
then
RateInMet = RateInMet + doseMet*kaMet*faMet*math.exp(- kaMet * (t-tlagMet-DosingTimesMetabolite[j]))
end
end

local C_Pv = RateInSub/(Qpv*BPsub) --substrate input into the portal vein
local C_Pv_met = RateInMet/(Qpv*BPmet) --metabolite input into the portal vein

local SubsysGradient = sc:getGradient(0) --substrate liver state variable index
local newSubsysGradient = SubsysGradient + (Qpv*C_Pv*BPsub/vLiv) --substrate input into liver

local MetsysGradient = sc:getGradient(21) --metabolite liver state variable index
local newMetsysGradient = MetsysGradient + (Qpv*C_Pv_met*BPmet/vLiv)--metabolite input into liver

sc:setGradient(0,newSubsysGradient)
sc:setGradient(21,newMetsysGradient)

return C_Pv
end
end

```

**Code S3.** Lua code for tumour growth inhibition model for siremadlin + trametinib combination 100+1 mg/kg).

--Drug Combination Custom PD TGI model features:

--Tumour growth follows a logistic model

--Killing hypothesis: Log-kill killing hypothesis with exponential kill kinetics

--Delay in treatment effect (Signal distribution model of delay - Lobo & Balthasar 2002) using 4 transit compartments

--Modeling of acquired resistance (2 subpopulations: sensitive and resistant)

--initial parameters estimates taken from models previously built in Monolix

```

function popSimSetup(...)
    sc:setParameterName(1, "Ts0") --tumour size of cancer sensitive cells population (mL)
    sc:setParameterName(2, "Tsr0") --tumour size of cancer resistant cells population (mL)
    sc:setParameterName(3, "crck") --tumour size and Tmax correlation constant
    sc:setParameterName(4, "kge") --tumour growth (1/day)
    sc:setParameterName(5, "s") --cancer sensitive cells population killing constants co-efficient
    sc:setParameterName(6, "lambda") --resistance factor (killr/kill)

```

```

sc:setParameterName(7, "tau")           --killing effect delay (h)
sc:setParameterName(8, "ksr")           --sensitive to resistant cells conversion rate (%)
sc:setParameterName(9, "gamma")         --PD interaction parameter taken from in vitro (%)
sc:setParameterName(10, "TSmax")        --maximal tumour size (mL)
sc:setParameterName(11, "killTrametinib") --killing effect constant for Trametinib
sc:setParameterName(12, "killSiremadlin") --killing effect constant for Siremadlin
sc:setParameterName(13, "AUCratioSiremadlin") --exposure ratio constant for Siremadlin in combination (PK DDI with Trametinib)
sc:setParameterName(14, "AUCratioTrametinib") --exposure ratio constant for Trametinib in combination (PK DDI with Siremadlin)

```

```
end
```

```
function individualSetup(...)
```

```

    --parameters initial estimates from Monolix
    local Ts0 = 0.1681           --tumour size of cancer sensitive cells population (mL)
    local Tsr0 = 0.000001        --tumour size of cancer resistant cells population (mL)
    local crck = 8.75            --tumour size and TSmax correlation constant
    local kge = 0.0075           --tumour growth (1/day)
    local s = 0.3                --cancer sensitive cells population killing constants coefficient
    local lambda = 12            --resistance factor (kkillr/kkill)
    local tau = 10.5             --killing effect delay (h)
    local ksr = 0.0302445        --sensitive to resistant cells conversion rate (%)
    local gamma = 1.2313         --PD interaction parameter taken from in vitro (%)
    local kkillSiremadlin = 0.0215 --killing effect constant for Siremadlin
    local kkillTrametinib = 0.0235 --killing effect constant for Trametinib
    local AUCratioSiremadlin = 1.1357 --AUC ratio for Siremadlin PK DDI
    local AUCratioTrametinib = 0.80365 --AUC ratio for Trametinib PK DDI
    local TumourPSSubNI = 0.084656 --Substrate (Siremadlin) passive permeability clearance between intra- and extracellular water of tumour (No Interaction) – mL/min/mL
    local TumourCLSubNI = 0.09554 --Substrate (Siremadlin) in vitro transporter mediated intrinsic clearance in tumour (No Interaction) – mL/min/mL
    local TumourPSMetNI = 0.02482 --Metabolite (Trametinib) passive permeability clearance between intra- and extracellular water of tumour (No Interaction) – mL/min/mL
    local TumourCLMetNI = 0.06027 --Metabolite (Trametinib) in vitro transporter mediated intrinsic clearance in tumour (No Interaction) – mL/min/mL
    local TumourPSSubI = 0.1407 --Substrate (Siremadlin) passive permeability clearance between intra- and extracellular water of tumour (Interaction) – mL/min/mL
    local TumourCLSubI = 0.04712 --Substrate (Siremadlin) in vitro transporter mediated intrinsic clearance in tumour (Interaction) – mL/min/mL
    local TumourPSMetI = 0.11092 --Metabolite (Trametinib) passive permeability clearance between intra- and extracellular water of tumour (Interaction) – mL/min/mL
    local TumourCLMetI = 0.21443 --Metabolite (Trametinib) in vitro transporter mediated intrinsic clearance in tumour (Interaction) – mL/min/mL
    local PSScalarSub = 1.662 --TumourPSSubI/TumourPSSubNI
    local TumourCLScalarSub = 0.493 --TumourCLSubI/TumourCLSubNI
    local PSScalarMet = 4.469 --TumourPSMetI/TumourPSMetNI
    local TumourCLScalarMet = 3.558 --TumourCLMetI/TumourCLMetNI

```

```

sc:setParameter(1, Ts0)
sc:setParameter(2, Tsr0)
sc:setParameter(3, crck)
sc:setParameter(4, kge)

```

```

    sc:setParameter(5, s)
    sc:setParameter(6, lambda)
    sc:setParameter(7, tau)
    sc:setParameter(8, ksr)
    sc:setParameter(9, gamma)
    sc:setParameter(10, TSmax)
    sc:setParameter(11, kkillTrametinib)
    sc:setParameter(12, kkillSiremadlin)
    sc:setParameter(13, AUCratioSiremadlin)
    sc:setParameter(14, AUCratioTrametinib)
end

```

```

function odeInitStep(su, P, ...)
    -- delay transit compartments
    su[1] = 0          -- K1 first transit compartment
    su[2] = 0          -- K2 second transit compartment
    su[3] = 0          -- K3 third transit compartment
    su[4] = 0          -- K4 fourth transit compartment
    su[5] = 0.1681     -- tumour size of cancer sensitive cells population estimate (mL)
    su[6] = 0.000001   -- tumour size of cancer resistant cells population estimate (mL)
    return 0
end

```

```

function odeRateStep(t,su,gu,P,...)

```

```

    C_Siremadlin = 1000 *   sc:getIndivPlasmaConc(sc.SUBSTRATE) -- get substrate (Siremadlin) systemic con-
centrations (units conversion uM --> nM)
    C_Trामetinib = 1000 * sc:getIndivPlasmaConc(sc.PRIMET1SUB) -- get metabolite (Trametinib) systemic con-
centrations (units conversion uM --> nM)

```

```

    --assign particular parameters to the array

```

```

    local Ts0 =          P[1]
    local Tsr0 =         P[2]
    local crck =         P[3]
    local kge =          P[4]
    local s =            P[5]
    local lambda =       P[6]
    local tau =          P[7]
    local ksr =          P[8]
    local gamma =        P[9]
    local TSmax =        P[10]
    local kkillTrametinib = P[11]
    local kkillSiremadlin = P[12]
    local AUCratioSiremadlin = P[13]
    local AUCratioTrametinib = P[14]

```

```

    local TSmax = crck*(Ts0+Tsr0) -- maximal tumour volume based on initial tumour size and maximal tumour
volume correlation constant

```

```

    --Drug interaction at the tumour distribution level, substrate and metabolite tumour PS and CL scaled. Disa-
bled to speed up calculation time.

```

```

    if t>=24 and t<=96
    then

```



```

--sc:feedbackIndivTumourVasPSScalar(sc.SUBSTRATE, 1.662)
--sc:feedbackIndivTumourCLScalar(sc.SUBSTRATE, 0.493)
--tumour interaction for metabolite available if drug distribution is set as minimal PBPK model instead full
PBPK model
--sc:feedbackIndivTumourVasPSScalar(sc.PRIMET1SUB, 4.469)
--sc:feedbackIndivTumourCLScalar(sc.PRIMET1SUB, 3.558)
end

local kkill = kkillTrametinib --Basic killing effect is assigned to Trametinib since it is longer administered

--Pharmacodynamic interaction at the tumour killing effect for drug combination assuming PD interaction pa-
rameter taken from in vitro studies and differences in exposure for both drugs
if t>=24 and t<=96
then
kkill = (kkillSiremadlin*AUCratioSiremadlin + kkillTrametinib*AUCratioTrametinib)*gamma
end

--killing effect is assigned to the concentrations of both drugs in plasma
local TK = (kkill*(1-math.exp(-s*(C_Siremadlin+C_Trामetinib))))
--Delay of effect for sensitive cancer population by transit compartments
gu[1] = (TK -su[1]) / tau
gu[2] = (su[1] - su[2]) / tau
gu[3] = (su[2] - su[3]) / tau
gu[4] = (su[3] - su[4]) / tau

TTS = su[5] + su[6] --initial total tumour size
-- To avoid infinite values of tumour volumes saturation of tumour growth for TS and TSr at 1e12 volume was
introduced
if (su[5] > 1E12) or (su[6] > 1E12) then
gu[5] = 0
gu[6] = 0
else
gu[5] = (kge*su[5]*(1-(TTS/TSmax))) - (su[4]+ksr*su[4])*su[5] --change tumour volume
of treatment sensitive cancer cells population
gu[6] = (kge*su[6]*(1-(TTS/TSmax))) + (ksr*su[4]*su[5]) - ((su[4]/lambda)*su[6]) --change tumour volume
of treatment resistant cancer cells population
end

TS = su[5]
TSr = su[6]

TotalTumourSize = TS + TSr --total tumour size

sc:feedbackTumourVol(TotalTumourSize)
return TotalTumourSize --tumour size output
end

```

## References

1. Witkowski, J.; Polak, S.; Rogulski, Z.; Pawelec, D. In Vitro/In Vivo Translation of Synergistic Combination of MDM2 and MEK Inhibitors in Melanoma Using PBPK/PD Modelling: Part I. *International Journal of Molecular Sciences* **2022**, Submitted.

2. Jeay, S.; Ferretti, S.; Holzer, P.; Fuchs, J.; Chapeau, E.A.; Wartmann, M.; Sterker, D.; Romanet, V.; Murakami, M.; Kerr, G.; et al. Dose and Schedule Determine Distinct Molecular Mechanisms Underlying the Efficacy of the P53–MDM2 Inhibitor HDM201. *Cancer Research* **2018**, *78*, 6257–6267, doi:10.1158/0008-5472.CAN-18-0338.
3. Lei, Y.; Zhenglin, Y.; Heng, L. MDM2 Inhibitors. U.S. Patent 11,339,171, 24 May 2022.
4. Yoo, J.Y.; Swanner, J.; Otani, Y.; Nair, M.; Park, F.; Banasavadi-Siddegowda, Y.; Liu, J.; Jaime-Ramirez, A.C.; Hong, B.; Geng, F.; et al. Oncolytic HSV Therapy Increases Trametinib Access to Brain Tumors and Sensitizes Them in Vivo. *Neuro Oncol* **2019**, *21*, 1131–1140, doi:10.1093/neuonc/noz079.
5. Pharmaceuticals and Medical Devices Agency (PMDA), Mekinist Initial Approval. Available online: <https://www.pmda.go.jp/files/000233741.pdf> (accessed on 19 August 2022).
6. Hofmann, F. Small Molecule HDM201 Inhibitor HDM201. In Proceedings of the AACR Annual Meeting 2016, New Orleans, LA, USA, 16–20 April 2016.
7. Food and Drug Administration (FDA), Trametinib Pharmacology Review. Available online: [https://www.accessdata.fda.gov/drugsatfda\\_docs/nda/2013/204114Orig1s000PharmR.pdf](https://www.accessdata.fda.gov/drugsatfda_docs/nda/2013/204114Orig1s000PharmR.pdf) (accessed on 19 August 2022).
8. King, A.J.; Arnone, M.R.; Bleam, M.R.; Moss, K.G.; Yang, J.; Fedorowicz, K.E.; Smitheman, K.N.; Erhardt, J.A.; Hughes-Earle, A.; Kane-Carson, L.S.; et al. Dabrafenib; Preclinical Characterization, Increased Efficacy When Combined with Trametinib, While BRAF/MEK Tool Combination Reduced Skin Lesions. *PLoS One* **2013**, *8*, e67583, doi:10.1371/journal.pone.0067583.
9. Gilmartin, A.G.; Bleam, M.R.; Groy, A.; Moss, K.G.; Minthorn, E.A.; Kulkarni, S.G.; Rominger, C.M.; Erskine, S.; Fisher, K.E.; Yang, J.; et al. GSK1120212 (JTP-74057) Is an Inhibitor of MEK Activity and Activation with Favorable Pharmacokinetic Properties for Sustained in Vivo Pathway Inhibition. *Clin Cancer Res* **2011**, *17*, 989–1000, doi:10.1158/1078-0432.CCR-10-2200.
10. Stein, E.M.; DeAngelo, D.J.; Chromik, J.; Chatterjee, M.; Bauer, S.; Lin, C.-C.; Suarez, C.; de Vos, F.; Steeghs, N.; Cassier, P.A.; et al. Results from a First-in-Human Phase I Study of Siremadlin (HDM201) in Patients with Advanced Wild-Type TP53 Solid Tumors and Acute Leukemia. *Clin Cancer Res* **2022**, *28*, 870–881, doi:10.1158/1078-0432.CCR-21-1295.
11. Flaherty, K.T.; Robert, C.; Hersey, P.; Nathan, P.; Garbe, C.; Milhem, M.; Demidov, L.V.; Hassel, J.C.; Rutkowski, P.; Mohr, P.; et al. Improved Survival with MEK Inhibition in BRAF-Mutated Melanoma. *New England Journal of Medicine* **2012**, *367*, 107–114, doi:10.1056/NEJMoa1203421.
12. Guerreiro, N.; Jullion, A.; Ferretti, S.; Fabre, C.; Meille, C. Translational Modeling of Anticancer Efficacy to Predict Clinical Outcomes in a First-in-Human Phase 1 Study of MDM2 Inhibitor HDM201. *AAPS J* **2021**, *23*, 28, doi:10.1208/s12248-020-00551-z.
